1  
2  
3  
4  
5  
6  
7  
8  
9  
10  
11  
12  
13  
14  
15  
16  
17  
18  
19  
20  
21  
22  
23  
24  
25  
26  
27  
28  
29

**Lack of specificity in *Geobacter* periplasmic electron transfer**

**Running Title:** Periplasmic *Geobacter* cytochromes

**Authors:** Sol Choi<sup>2</sup>, Chi Ho Chan<sup>1</sup>, Daniel R. Bond<sup>1,3</sup>

**Affiliations**

1 BioTechnology Institute, University of Minnesota, Saint Paul, MN

2 Department of Biochemistry, Molecular Biology, and Biophysics, University of Minnesota, Minneapolis, MN

3 Department of Plant and Microbial Biology, University of Minnesota, Saint Paul, MN

**Corresponding author:**

Daniel R. Bond

1479 Gortner Ave

140 Gortner Laboratory

Saint Paul, MN, 55108

dbond@umn.edu

30 **Abstract**

31

32 Reduction of extracellular acceptors requires electron transfer across the periplasm. In  
33 *Geobacter sulfurreducens*, three separate cytoplasmic membrane cytochromes are  
34 utilized for menaquinone oxidation depending on redox potential, and at least five  
35 cytochrome conduits span the outer membrane. Because *G. sulfurreducens* produces 5  
36 structurally similar triheme periplasmic cytochromes (PpcABCDE) that differ in  
37 expression level, midpoint potential, and heme biochemistry, separate periplasmic  
38 carriers could be needed for specific redox potentials, terminal acceptors, or growth  
39 conditions. Using a panel of marker-free single, quadruple, and quintuple mutants, the  
40 role of *ppcA* and its four paralogs was examined. Three quadruple mutants containing  
41 only one paralog (PpcA, PpcB, and PpcD) reduced Fe(III) citrate and Fe(III) oxide at the  
42 same rate and extent, even though PpcB and PpcD were at much lower levels than  
43 PpcA in the periplasm. Mutants containing only PpcC and PpcE showed defects, but  
44 were nearly undetectable in the periplasm. When expressed sufficiently, PpcC and  
45 PpcE supported wild type Fe(III) reduction. PpcA and PpcE from *G. metallireducens*  
46 similarly restored metal respiration in *G. sulfurreducens*. PgcA, an unrelated  
47 extracellular triheme c-type cytochrome, also participated in periplasmic electron  
48 transfer. While triheme cytochromes were important for metal reduction, sextuple  
49  $\Delta ppcABCDE \Delta pgcA$  mutants still grew near wild type rates and displayed normal cyclic  
50 voltammetry profiles when using anodes as electron acceptors. These results reveal  
51 broad promiscuity in the periplasmic electron transfer network of metal-reducing  
52 *Geobacter*, and suggests an as-yet undiscovered periplasmic mechanism supports  
53 electron transfer to electrodes.

54

55 **Importance**

56

57 Many inner and outer membrane redox proteins used by *Geobacter* for electron transfer  
58 to extracellular acceptors are known to have specific functions. However, how these are  
59 connected by periplasmic redox carriers remains poorly understood. Since *Geobacter*  
60 *sulfurreducens* contains multiple paralogous triheme periplasmic cytochromes, each  
61 with their own unique biochemical properties and expression profiles, it has been  
62 hypothesized that each cytochrome is involved in different respiratory pathways  
63 depending on redox potential or energy conservation needs. Here we show that instead  
64 of being specific for single conditions, the many periplasmic cytochromes of *Geobacter*  
65 show evidence of being highly promiscuous. Surprisingly, while any one of 6 triheme  
66 cytochromes could support similar growth with soluble or insoluble metals, none of  
67 these were required when cells utilized electrodes. These findings could simplify  
68 construction of synthetic electron transfer pathways.

69

70

## 71 Introduction

72

73 In anaerobic respirations where the terminal electron acceptor is too large to cross the  
74 membrane, metabolically generated electrons are routed out of the cell via a process  
75 called extracellular electron transfer (1–3). To achieve this, bacteria combine  
76 cytoplasmic membrane quinone oxidoreductases, periplasmic carriers, trans-outer  
77 membrane conduits, and conductive extracellular wires in an electrical network linking  
78 intracellular biological reactions to extracellular events (2, 4). These unique electron  
79 transport chains alter metal redox states, directly exchange electrons with other  
80 bacteria, and provide new tools for bioelectronic applications (5–8).

81

82 *Geobacter sulfurreducens* is a model of extracellular electron transfer due to its ability to  
83 reduce acceptors such as Fe(III), Mn(IV), U(VI), V(V), Tc(VII), and electrodes (9). A  
84 central question raised by this versatility involves whether different redox proteins are  
85 required for each acceptor. To date, it is known that three separate inner membrane  
86 quinone oxidases are utilized depending on the redox potential of the terminal acceptor  
87 (10–13). In contrast, of five characterized outer membrane-spanning cytochrome  
88 conduits, specific complexes are linked to reduction of each type of metal or surface  
89 (14). Separate multiheme cytochrome nanowires are also used during growth with  
90 different terminal electron acceptors (15–17).

91

92 Some electron transfer mechanism is required to connect this array of inner and outer  
93 membrane proteins, as they are electrically separated by the ~30 nm-wide periplasm  
94 and cell wall (18, 19). Periplasmic redox carriers are often small promiscuous proteins  
95 able to form weak complexes and facilitate rapid electron transfer with multiple  
96 structurally unrelated proteins (20–25). A well-studied candidate for this role in *G.*  
97 *sulfurreducens* is the highly abundant 10 kDa triheme *c*-type cytochrome PpcA. Deletion  
98 of *ppcA* causes significant defects in Fe(III) reduction (26, 27), and purified PpcA forms  
99 functional low affinity complexes with multiple periplasmic redox partners (23, 28, 29).  
100 However, *G. sulfurreducens* also produces four paralogs (PpcB, PpcC, PpcD, and  
101 PpcE) with highly similar heme arrangements and protein folds, and genetic evidence

102 indicates these proteins can influence electron transfer (30, 31). For example, in growth-  
103 independent assays, deletion of *ppcA* impacts, but does not eliminate, insoluble Fe(III)  
104 oxide reduction, and has an even smaller effect on soluble Fe(III) citrate reduction (26).  
105 While PpcB can be more abundant during Fe(III) citrate growth, deletion of *ppcB*  
106 increases Fe(III) citrate reduction rates (31, 32). PpcE is rarely detected, but deletion of  
107 *ppcE* is reported to increase Fe(III) reduction rates (32).

108  
109 Biochemical differences further suggest unique roles for Ppc paralogs. PpcA has two  
110 higher potential hemes near -100 mV vs. Standard Hydrogen Electrode (SHE), and only  
111 one below -150 mV, while other paralogs show the opposite pattern (33). PpcC exists in  
112 two unique conformations, depending on its oxidation state (34). PpcA and PpcD  
113 display a phenomenon coined the 'Redox-Bohr' effect, where reduction shifts the pKa of  
114 a heme propionate side chain more than one pH unit (35, 36). When certain PpcA and  
115 PpcD hemes are reduced, this shift can cause uptake of a proton. Protonation makes  
116 heme oxidation less favorable by ~ 50 mV, but if an adequate acceptor is available,  
117 oxidation drives proton release. At a cost of about 50 mV/e<sup>-</sup>, this could transport a  
118 proton across the periplasm, in a cycle proposed to aid energy generation when cells  
119 use PpcA or PpcD (35, 36).

120  
121 While it is known that expression of *ppcA* alone in a mutant lacking all 5 paralogs will  
122 fully restore wild type Fe(III) citrate reduction, data supporting functional roles for the  
123 remaining periplasmic carriers is incomplete and sometimes contradictory (27). In this  
124 work, a panel of marker-free single, quadruple, and quintuple *ppc* deletion mutants were  
125 constructed. Some quadruple mutants containing only one paralog showed defects in  
126 Fe(III) reduction, but these changes were correlated with low periplasmic cytochrome  
127 abundance. Standardizing periplasmic levels using the *ppcA* promoter, ribosomal  
128 binding site (RBS), and/or signal peptide showed for the first time that any *ppc*  
129 cytochrome, when expressed sufficiently, will support wild type reduction of both Fe(III)  
130 citrate and Fe(III) oxide. PpcA and PpcE from *G. metallireducens* were also capable of  
131 restoring metal respiration in *G. sulfurreducens*. No significant differences in growth  
132 rate, extent of reduction, or use of specific acceptors could be found in cells using any

133 form of PpcA or PpcD, compared to PpcB, PpcC or PpcE. PgcA, an unrelated  
134 extracellular triheme *c*-type cytochrome (37), was also shown to contribute to  
135 periplasmic electron transfer. Surprisingly, while triheme cytochromes were absolutely  
136 essential for wild type level metal reduction, the sextuple deletion mutant lacking  
137 *ppcABCDE* and *pgcA* still grew near wild type rates when using anodes as electron  
138 acceptors. These results reveal broad promiscuity in this periplasmic cytochrome family,  
139 and show that electron transfer to electrodes can use a Ppc-independent mechanism.

140

## 141 Results

142

### 143 Single deletions of Ppc-family cytochrome genes do not affect soluble or 144 insoluble Fe(III) reduction 145

146 *G. sulfurreducens* encodes five homologous ~10 kDa triheme periplasmic cytochromes  
147 which range in pairwise identity from 46 - 77%. To test if any of these cytochromes were  
148 necessary for reduction of Fe(III) citrate or Fe(III) oxide, markerless single deletion  
149 mutants lacking *ppcA*, *ppcB*, *ppcC*, *ppcD*, or *ppcE* were compared to wild type (Fig 1A,  
150 1B). None of these single deletion mutants exhibited a defect in Fe(III) reduction rate, or  
151 in the final extent of reduction for either Fe(III) form, indicating that no single gene was  
152 essential under the conditions tested.

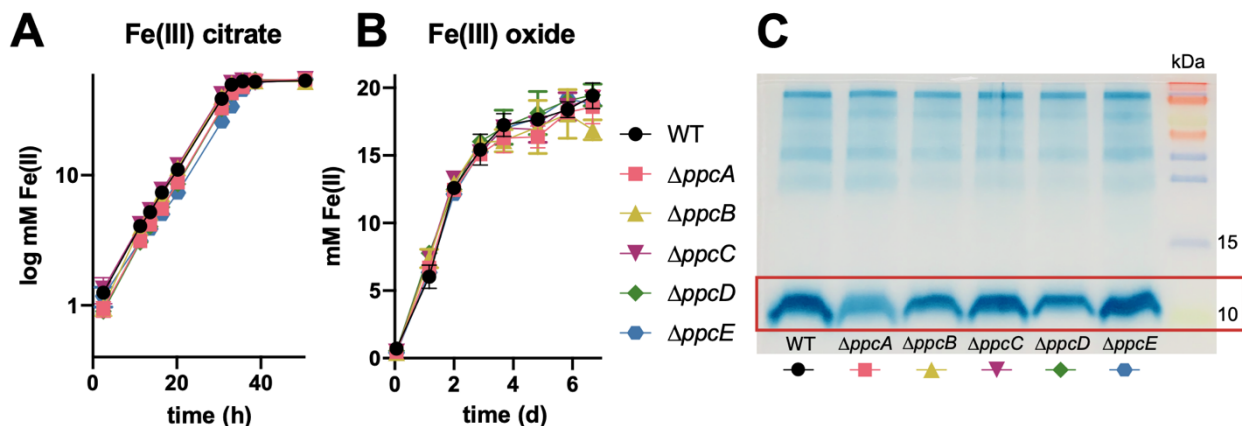

**Fig 1. Soluble Fe(III) citrate and insoluble Fe(III) oxide reduction is not affected in *G. sulfurreducens* mutants lacking single Ppc-family cytochromes.** (A) Fe(III) citrate reduction. (B) Fe(III) oxide reduction. (A) and (B) represent mean  $\pm$  standard deviations with 3 technical replicates. (C) Heme-staining of periplasmic fractions from WT and single deletion mutants, representative of two independent experiments.

153 Prior transcriptional and proteomic studies have shown that other PpcA paralogs are  
154 always expressed and present in the periplasm (31). Consistent with this, when  
155 periplasmic proteins were obtained, 10 kDa cytochromes could still be detected in each  
156 *G. sulfurreducens* single mutant (Fig 1C). Deletion of *ppcA* caused the greatest  
157 decrease in the abundance of the pool, followed by  $\Delta pp cD$  and  $\Delta pp cB$ . In contrast,  
158  $\Delta pp cC$  or  $\Delta pp cE$  showed little decrease in the abundance of 10 kDa periplasmic  
159 cytochromes.

160

### 161 **Quadruple mutants reveal PpcA, PpcB and PpcD are equally able to support WT** 162 **Fe(III) reduction**

163

164 Quadruple markerless deletion strains were then constructed to better isolate the roles  
165 of individual cytochromes. Mutants lacking four *ppc*-homologs were labeled according to  
166 the gene still remaining in its original genomic context. For example,  $\Delta pp cBCDE$  was  
167 referred to as *ppcA*<sup>+</sup>,  $\Delta pp cABCD$  as *ppcE*<sup>+</sup>, and the strain lacking all five ( $\Delta pp cABCDE$ )  
168 was referred to as  $\Delta pp c5$ .

169 Three quadruple deletion strains (*ppcA*<sup>+</sup>, *ppcB*<sup>+</sup>, and *ppcD*<sup>+</sup>) retained wild type rates and  
170 extents of both Fe(III) citrate and Fe(III) oxide reduction. In contrast, *ppcC*<sup>+</sup> and *ppcE*<sup>+</sup>  
171 showed strong defects with both acceptors. Deletion of all five *ppc* cytochromes further

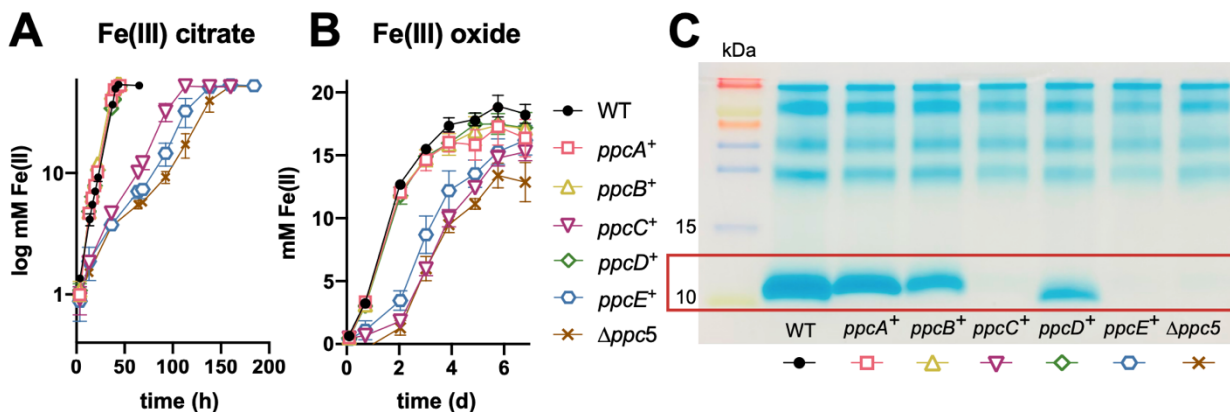

**Fig 2. Single periplasmic cytochromes are to support Fe(III) citrate and Fe(III) oxide reduction, based on quadruple and quintuple *ppc* deletion strains.** (A) Fe(III) citrate reduction (n=3 independent replicates). (B) Fe(III) oxide reduction (n=2) (C) Heme-staining of the periplasmic fraction showing nearly undetectable 10 kDa cytochrome in *ppcC*<sup>+</sup> and *ppcE*<sup>+</sup> mutants, representative of five independent experiments.

172 diminished, but did not eliminate, Fe(III) reduction (Fig 2A, 2B). This  $\Delta ppc5$  strain grew  
173 70% slower than wild type with Fe(III) citrate (Fig 2).

174

175 When periplasmic proteins from quadruple and quintuple mutants were compared (Fig  
176 2C), 10 kDa cytochromes were only detected in  $ppcA^+$ ,  $ppcB^+$ , and  $ppcD^+$ , the strains  
177 demonstrating wild type growth. In contrast, cytochrome at 10 kDa was nearly  
178 undetectable in strains with strong defects ( $ppcC^+$ ,  $ppcE^+$ , and  $\Delta ppc5$ ). Consistent with  
179 data from single mutants (Fig 1C), where deletion of  $ppcA$  caused the largest decrease  
180 in cytochrome abundance, the intensity of  $ppcA^+$  was most intense among the  
181 quadruple deletion strains, followed by  $ppcD^+$  and  $ppcB^+$ . This showed that even  
182 cytochromes with much lower native abundance, such as PpcB and PpcD, could still  
183 support metal reduction similar to the more abundant PpcA.

184

185 These data also suggested that the primary explanation for the failure of  $ppcC^+$  and  
186  $ppcE^+$  strains to reduce Fe(III) could be related to their low abundance, rather than any  
187 biochemical specificity. As these periplasmic fractions were routinely obtained from  
188 fumarate-grown cells, periplasmic fractions were also collected from all mutants grown  
189 in Fe(III) citrate (Fig S2). Consistent with prior transcriptional studies reporting few  
190 differences in  $ppc$  paralog expression levels between these two conditions (Fig S3),  
191  $ppcA^+$ ,  $ppcB^+$ , and  $ppcD^+$  strains contained detectable 10 kDa cytochrome, while  
192  $ppcC^+$ ,  $ppcE^+$ , and  $\Delta ppc5$  did not.

193

#### 194 **PgcA, previously identified as an extracellular c-type cytochrome, also** 195 **contributes to periplasmic electron transfer**

196

197 The finding that the  $\Delta ppc5$  strain had significant residual extracellular electron transfer  
198 ability was unexpected. We designed enrichments for spontaneous mutants  
199 upregulating or increasing use of cryptic mechanisms in strains lacking some or all Ppc-  
200 family cytochromes. While incubations of quintuple  $\Delta ppc5$  strains did not readily yield  
201 faster-growing suppressor strains, a slow-growing strain lacking the three most



202

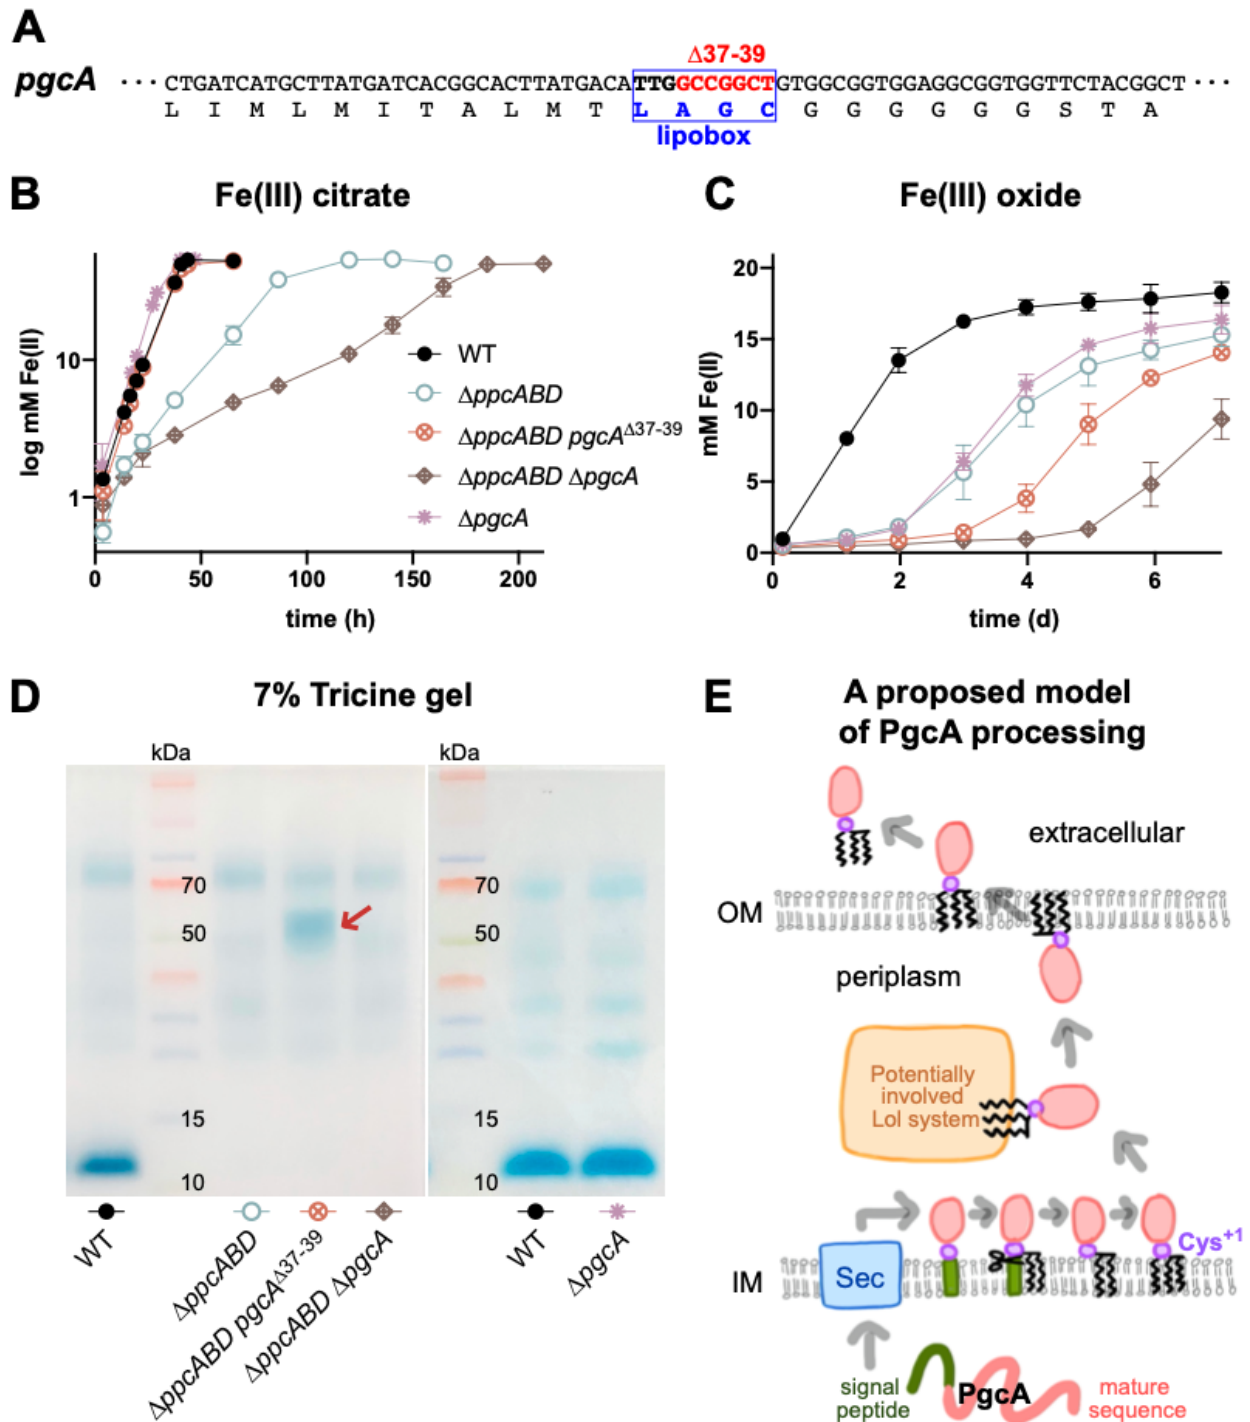

**Fig 3. Evidence that PgcA participates in periplasmic electron transfer.** (A) Partial amino acid sequence of PgcA containing the lipobox domain (blue) and deleted nucleotides (red) in  $\Delta ppcABD pgcA^{\Delta 37-39}$ . Fe(III) reduction (B,C) and periplasmic cytochrome abundance (D) of the  $\Delta ppcABD pgcA^{\Delta 37-39}$  strain, showing increased Fe(III) citrate reduction by cells retaining PgcA in the periplasm, and expected Fe(III) oxide defect. (E) Proposed model of PgcA processing, from (46).

203 abundant Ppc-cytochromes ( $\Delta ppcABD$ ), evolved accelerated Fe(III) citrate reduction.  
204 Re-isolation and re-sequencing identified a single 9 bp in-frame deletion within a gene  
205 encoding *pgcA*, a triheme cytochrome unrelated to any *ppc* homologs (Fig 3A).

206

207 PgcA is an extracellular triheme c-type cytochrome with a putative lipoprotein signal  
208 sequence (37). As the suppressor strain deleted three amino acids (A-G-C) within the  
209 N-terminus 'lipobox' that is typically the target of acylation before cleavage by the  
210 lipoprotein-specific signal peptidase (Lsp/SpII) (45), this strain was designated  
211  $\Delta ppcABD pgcA^{\Delta 37-39}$ . We hypothesized that the mutated signal peptide was inhibiting  
212 translocation of PgcA out of the periplasm (Fig 3E).

213

214 Periplasmic proteins from the suppressor strain  $\Delta ppcABD pgcA^{\Delta 37-39}$  contained a new  
215 abundant cytochrome near the molecular weight of PgcA (50 kDa) (Fig 3D and Fig S4).  
216 Ultracentrifugation of periplasmic fractions did not cause any significant change in the  
217 abundance of cytochromes, confirming that membrane-bound cytochromes were not  
218 present in these periplasmic fractions (Fig S1). Deletion of the mutant *pgcA*<sup>Δ37-39</sup> from  
219  $\Delta ppcABD pgcA^{\Delta 37-39}$  eliminated this 50 kDa periplasmic cytochrome (Fig 3D and Fig  
220 S4), and produced a strain even more impaired than the parent  $\Delta ppcABD$  (Fig 3B).  
221 When native *pgcA* was deleted from the  $\Delta ppc5$  background, the resulting  $\Delta ppc5 \Delta pgcA$   
222 demonstrated the lowest rate of metal reduction, less than 10% of wild type with Fe(III)  
223 citrate (Fig 4). These lines of evidence support a model where a change in PgcA  
224 localization increased its periplasmic abundance to rescue wild type periplasmic  
225 electron transfer.

226

227 While PgcA is not essential for Fe(III) citrate reduction in wild type cells, extracellular  
228 PgcA is critical for rapid insoluble metal oxide reduction (37). According to the  
229 hypotheses that PgcA is retained in the periplasm of the  $\Delta ppcABD pgcA^{\Delta 37-39}$  strain,  
230 cells should have the same defect as  $\Delta pgcA$  when Fe(III) oxide is the acceptor.

231 Consistent with this model, both  $\Delta ppcABD pgcA^{\Delta 37-39}$  and  $\Delta ppc5 \Delta pgcA$  strains reduced

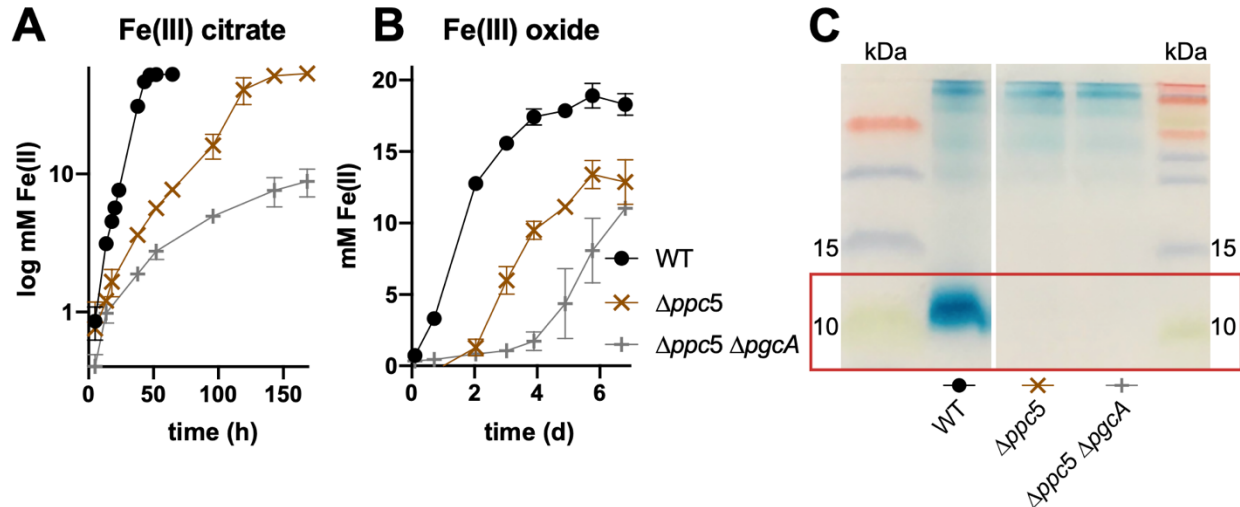

**Fig 4. Decrease in residual  $\Delta ppc5$  electron transfer ability by deletion of *pgcA*.** (A) Fe(III) citrate reduction. (B) Fe(III) oxide reduction. Curves in (A) and (B) are representative of three independent biological replicates. (C) Heme-staining of the periplasmic fraction (16% tricine), representative of two independent experiments.

232 Fe(III) oxide poorly (Fig 3B and 3C). Together, these data suggest that, as PgcA is  
233 being processed in the periplasm of wild type cells, it can participate in periplasmic  
234 electron transfer. As *pgcA* is typically more highly expressed during reduction of  
235 insoluble metal oxides (31), it likely only plays a minor role during reduction of soluble  
236 compounds.

237

238 **Engineering *ppcC* and *ppcE* for increased periplasmic abundance shows these**  
239 **cytochromes can also support WT Fe(III) reduction.**

240

241 Strains containing only *ppcC* or *ppcE* under control of their native promoters reduced  
242 Fe(III) poorly and demonstrated a lack of 10 kDa periplasmic cytochromes in  
243 periplasmic extracts (Fig 2, Fig S3). Thus, we sought to more fairly test the properties of  
244 individual cytochromes by developing a standardized expression method. Beginning  
245 with the  $\Delta ppc5 \Delta pgcA$  mutant containing the lowest background levels of metal  
246 reduction (Fig 4), *ppcC* and *ppcE* were cloned downstream of the *ppcA* promoter-RBS  
247 sequence, as *ppcA* is one of the most highly expressed genes in *G. sulfurreducens*

248

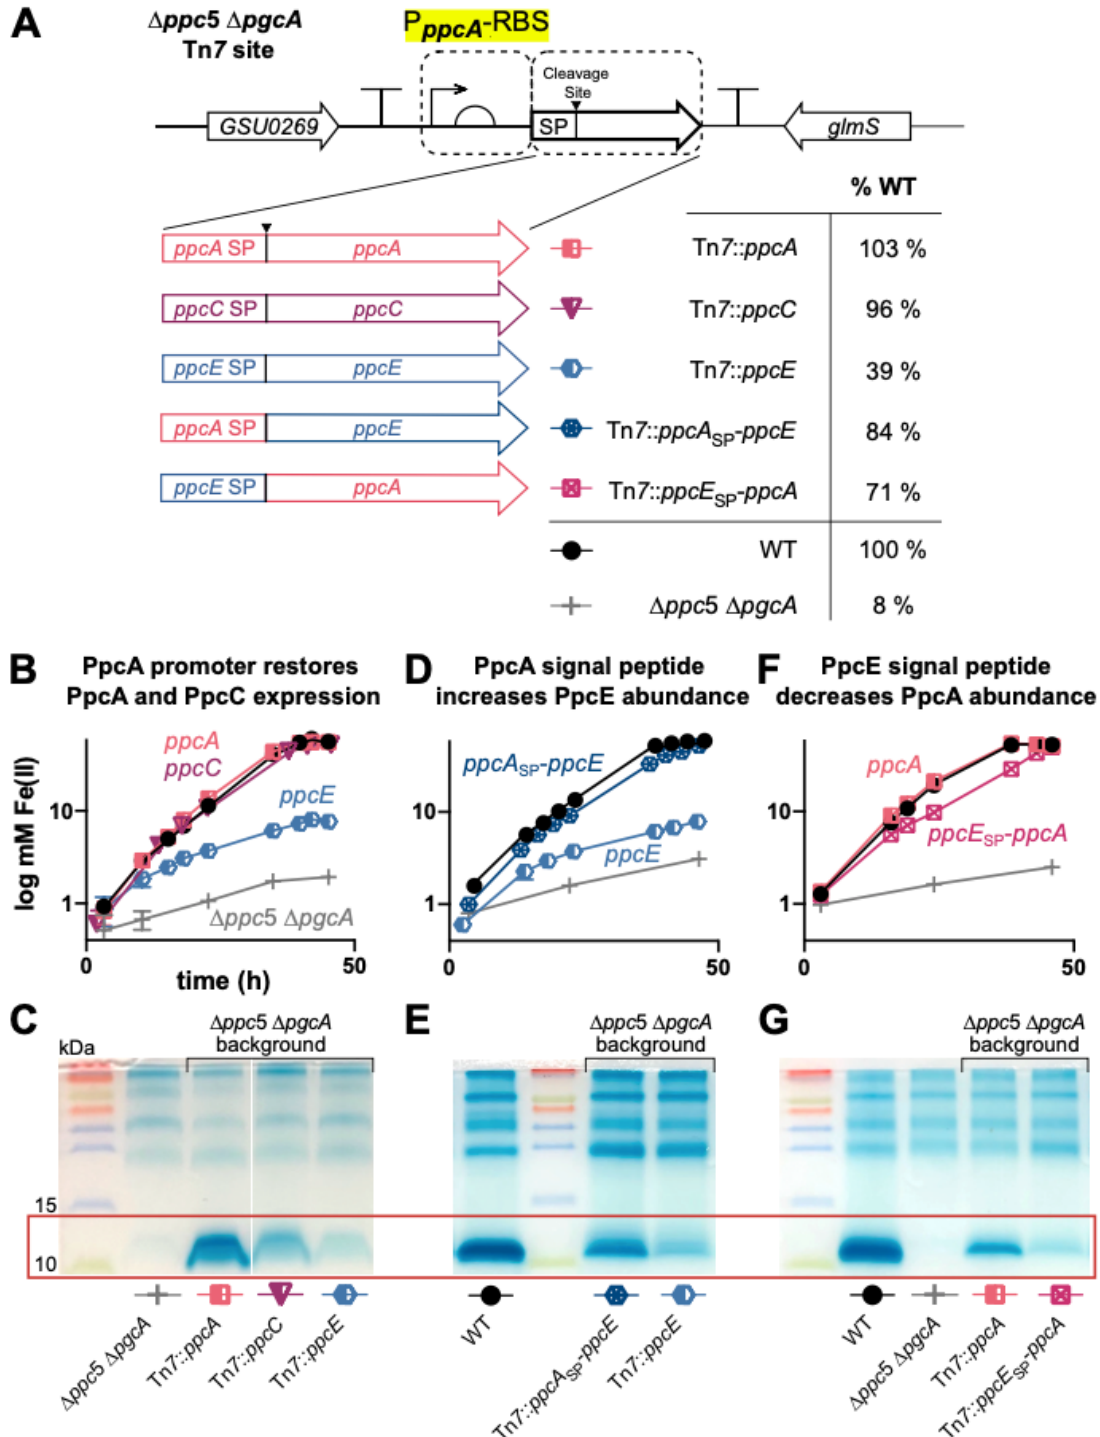

**Fig 5. Fe(III) reduction by PpcC and PpcE-containing strains is similar when periplasmic cytochrome abundance is restored.** (A) Cytochrome re-expression strategy, combining the *ppcA* promoter and RBS (highlighted) with different signal peptides (SP). (B,D,F) Fe(III) citrate reduction (n=3) (C,E,G) Heme-stained periplasmic fractions. While PpcC abundance increased with use of the *ppcA* promoter (B,C), PpcE required both the *ppcA* promoter and PpcA signal peptide (D, E). Fusion of the PpcE signal peptide to PpcA decreased PpcA abundance (F, G).

249 (13). As controls, *ppcA* and *ppcB* were cloned downstream of the same promoters using  
250 the identical protocol. All constructs were integrated in a neutral site downstream of  
251 *glmS* (Fig 5A).

252

253 Expression of *ppcA* in this system successfully rescued wild type Fe(III) reduction and  
254 produced abundant periplasmic PpcA in  $\Delta ppc5 \Delta pgcA$  (Fig 5B, 5C). Similar results were  
255 obtained when *ppcB* was expressed using the same strategy (Fig S5). When *ppcC* was  
256 expressed under control of this *ppcA* promoter system, wild type Fe(III) reduction was  
257 also rescued, and moderate levels of periplasmic PpcC were detected (Fig 5B, 5C).  
258 However, expression of *ppcE* under the same conditions ( $\Delta ppc5 \Delta pgcA$  Tn7::*ppcE*) only  
259 partially improved metal reduction, and produced barely detectable periplasmic  
260 cytochrome around 10 kDa (Fig 5D, 5E).

261

262 Multiple modifications were tested to identify the cause of low PpcE abundance.  
263 Recoding *ppcE* to eliminate rare *G. sulfurreducens* codons did not improve the  
264 abundance of PpcE or rescue wild type Fe(III) citrate reduction (Fig S6). However, when  
265 the PpcE signal peptide was replaced with the PpcA signal peptide sequence (*ppcA*<sub>SP</sub>-  
266 *ppcE*), metal reduction improved to near wild type, and PpcE in the periplasm increased  
267 (Fig 5D, 5E). To further test the hypothesis that PpcE signal peptides affected  
268 periplasmic protein levels, we generated a chimeric protein replacing the signal peptide  
269 of PpcA with that of PpcE (*ppcE*<sub>SP</sub>-*ppcA*) (Fig 5F and 5G). The PpcE signal peptide  
270 strongly decreased PpcA abundance, even though the gene remained under control of  
271 the *ppcA* promoter-RBS (Fig 5G). This decrease only caused a small defect in Fe(III)  
272 citrate reduction (Fig 5F), again showing that large amounts of a Ppc cytochrome were  
273 not needed for rapid electron transfer.

274

275 Finally, PpcC and PpcE constructs were introduced into the  $\Delta ppc5$  background (as  
276 PgcA is necessary for Fe(III) oxide reduction) to test their ability to participate in Fe(III)  
277 oxide reduction. Both the PpcC and PpcE re-expression strains regained Fe(III) oxide  
278 reduction to rates similar to the wild type (Fig 6A). In addition, periplasmic levels of each  
279 cytochrome in the  $\Delta ppc5$  background were similar to what was obtained in the  $\Delta ppc5$

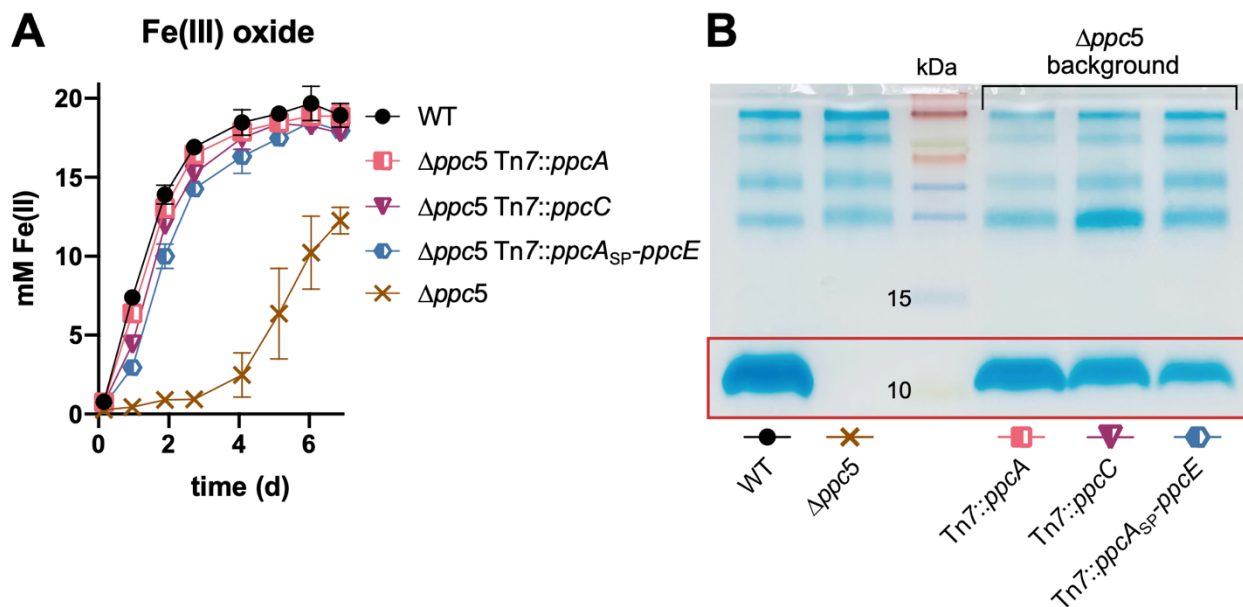

**Fig 6. Expression of *G. sulfurreducens* ppcC and ppcE cytochromes in  $\Delta ppc5$  also rescues Fe(III) oxide reduction.** (A) Fe(III) oxide reduction. (B) Heme-staining of periplasmic fraction. The gel is representative of two independent experiments.

280  $\Delta ppcA$  background (Fig 6B). These combined results show that PpcB, PpcC, PpcD, and  
281 PpcE can support wild type rates and extents of both soluble and insoluble metal  
282 reduction in *G. sulfurreducens*.

283

#### 284 Expression of periplasmic cytochromes from other organisms

285

286 As all Ppc paralogs, and even an unrelated extracellular cytochrome, could support  
287 periplasmic electron transfer during metal reduction in *G. sulfurreducens*, a panel of  
288 homologs were tested for their ability to be targeted to the periplasm and restore  
289 electron transfer in the  $\Delta ppc5 \Delta ppcA$  background. These included the PpcA and PpcE  
290 homologs from *G. metallireducens* (81% and 62% identity to PpcA in *G.*  
291 *sulfurreducens*), a structurally related tetraheme c-type cytochrome from *Desulfovibrio*  
292 *vulgaris* (Fig S7C), and the tetraheme CctA (Fig S7D) involved in *Shewanella*  
293 *oneidensis* periplasmic electron transfer (Fig 7).

294

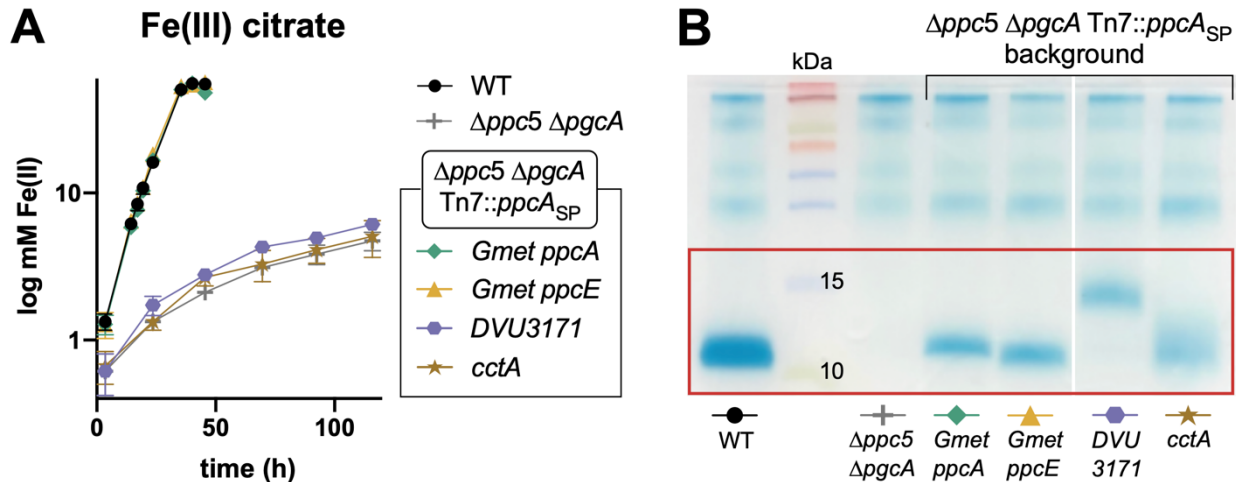

**Fig 7. Successful heterologous expression of periplasmic cytochromes from other species in *G. sulfurreducens*.** (A) Fe(III) citrate reduction. Curves in (A) are representative of two independent experiments. (B) Heme-staining of periplasmic fractions showing proper localization of introduced cytochromes.

295 All heterologous constructs used the *G. sulfurreducens ppcA* promoter, ribosomal  
 296 binding site, and signal peptide sequence, and were detected in the periplasm (Fig 7B).  
 297 However, only the homologs from *G. metallireducens* fully rescued Fe(III) citrate  
 298 reduction in  $\Delta ppc5 \Delta pgcA$  (Fig 7A). CctA and DVU3171 did not improve Fe(III) citrate  
 299 reduction.

300

### 301 Deletion of all six periplasmic cytochromes has little effect on electrode reduction

302

303 In every experiment up to this point, as long as the cytochrome was detectable in the  
 304 periplasmic fraction, *ppcA*, *ppcB*, *ppcC*, *ppcD*, or *ppcE* supported comparable rates and  
 305 extents of reduction, and the small amount of background electron transfer activity  
 306 observed in the absence of these five genes could be attributed to *pgcA*. Based on  
 307 these results, extracellular respiration by *G. sulfurreducens* requires at least one of  
 308 these periplasmic cytochromes for wild type level reduction, and the  $\Delta ppc5 \Delta pgcA$  strain  
 309 would be expected to be highly defective with all other extracellular electron acceptors.

310

311 Unexpectedly, the  $\Delta ppc5 \Delta pgcA$  strain grew only 8% slower when using a poised  
312 electrode (+0.24 vs. SHE) as the sole electron acceptor, and reached the same  
313 maximal current as the wild type (Fig 8A). During the exponential phase of growth, the  
314  $\Delta ppc5 \Delta pgcA$  mutant actually produced current 12% faster than the wild type  
315 (expressed as  $\mu\text{A}$  produced per  $\mu\text{g}$  protein,  $n=4$ , measured at  $100 \mu\text{A}\cdot\text{cm}^{-2}$ ). This rate of  
316 current production coupled with a slightly slower growth rate predicted a minor defect in  
317 growth yield. Dividing the amount of biomass on electrodes at  $100 \mu\text{A}\cdot\text{cm}^{-2}$  by the

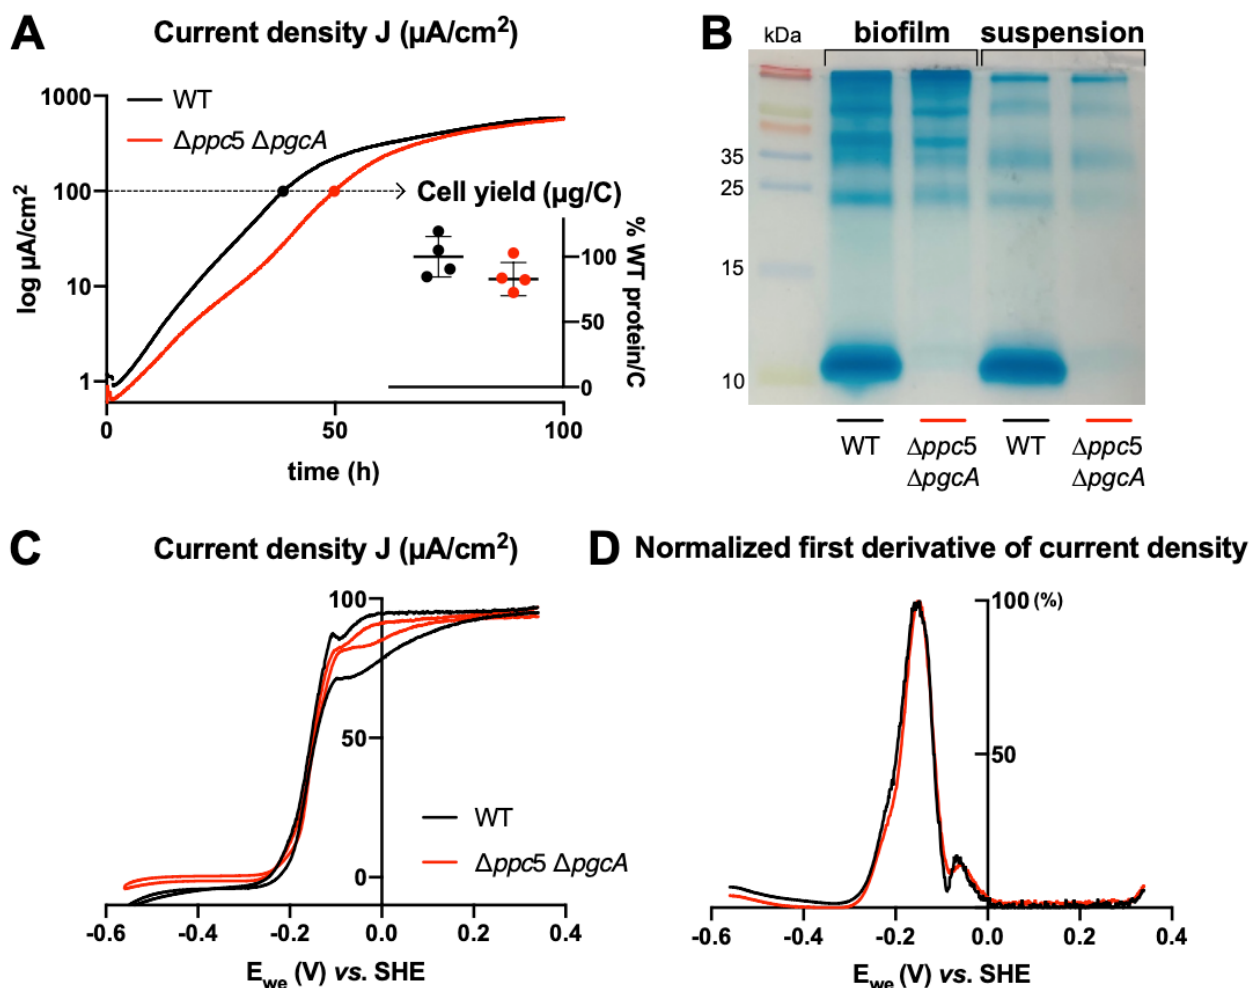

**Fig 8. No known periplasmic cytochrome is important for electrode reduction.**

Comparison of wild type vs.  $\Delta ppc5 \Delta pgcA$  grown with an anode poised at +0.24 V vs SHE. (A) Chronoamperometry of WT and  $\Delta ppc5 \Delta pgcA$  (B) 16% tricine gel of osmotic shock periplasmic fractions from biofilm and planktonic cells after 4 days of electrode growth. (C) Cyclic voltammetry of wild type and  $\Delta ppc5 \Delta pgcA$ . (D) First derivative of data from (C).



318 integrated amount of current produced by the time of harvest was consistent with a 13%  
319 reduction in apparent yield of  $\Delta ppc5 \Delta pgcA$  (as protein/coulomb) (Fig 8A).

320

321 Periplasmic fractions recovered from both planktonic and anode biofilm cells did not  
322 reveal induction of any new periplasmic cytochromes that could explain the unexpected  
323 growth of  $\Delta ppc5 \Delta pgcA$  with electrodes (Fig 8B). Cyclic voltammetry showed that the  
324 characteristic onset and midpoint potentials were similar in wild type and  $\Delta ppc5 \Delta pgcA$ ,  
325 indicating electron transfer across a range of redox potentials was unaffected (Fig 8C  
326 and 8D). The only qualitative difference observed was a reduced hysteresis between  
327 forward and reverse scans, a feature that could reflect lower electron storage capacity  
328 in cells lacking the normally highly abundant Ppc family cytochromes. Otherwise, there  
329 was no evidence that any of the six triheme cytochromes removed from this strain were  
330 necessary for electron transfer to electrodes.

331

### 332 **Evidence for triheme cytochromes being necessary for oxidative stress** 333 **protection**

334

335 Previous research reported a transient interaction between PpcA and the diheme  
336 cytochrome *c* peroxidase MacA (12, 13). If periplasmic cytochromes provide reducing  
337 power to peroxidases, mutants should have increased sensitivity to H<sub>2</sub>O<sub>2</sub> stress. In  
338 lawns of cells exposed to 3% H<sub>2</sub>O<sub>2</sub>-soaked filter discs, the zone of inhibition was  
339 unchanged for any single *ppc* deletion mutant compared to wild type cells (Fig S5).  
340 Mutants that that lacked most periplasmic cytochromes (*ppcC*<sup>+</sup>, *ppcE*<sup>+</sup>,  $\Delta ppc5$ , and  
341  $\Delta ppc5 \Delta pgcA$ ) exhibited detectable larger zones of inhibition (Fig S8). These data were  
342 consistent with multiple Ppc-family cytochromes, as well as PgcA, aiding H<sub>2</sub>O<sub>2</sub>  
343 detoxification.

344

### 345 **Discussion**

346 Every *Geobacter* genome contains between 4-6 PpcA paralogs that can share similar  
347 heme packing and backbone structures, but have significant differences in redox  
348 potentials, microstates of partial oxidation, protonation behaviors, and surface charges

349 near solvent-exposed hemes (30, 35). PpcA homologs from *G. sulfurreducens* and *G.*  
350 *metallireducens* show such large differences in midpoint potential and heme oxidation  
351 order that the two cytochromes are proposed to interact with different redox partners. In  
352 this study, we could find no direct evidence that these biochemically different proteins  
353 had unique roles, redox potentials, partners, or energetic benefits during reduction of  
354 both soluble and insoluble Fe(III). Instead, genetic data suggests the triheme  
355 cytochromes PpcA-E, PgcA, and PpcA and PpcE homologs from *G. metallireducens*  
356 are promiscuous enough to support rapid and complete reduction of both soluble and  
357 insoluble Fe(III). As none of these cytochromes were required for electron transfer to  
358 electrodes, another as-yet unidentified periplasmic electron carrier is utilized during  
359 conductive biofilm growth.

360 The growth phenotypes of some deletion mutants differed from earlier insertional  
361 mutant data. For example, in prior washed cell U(VI) and Fe(III) reduction assays,  
362  $\Delta ppcE$ ,  $\Delta ppcBC$ , and  $\Delta ppcD$  were reported to show slightly faster Fe(III) reduction (32).  
363 In addition, a comprehensive deletion of all five *ppc* paralogs eliminated *G.*  
364 *sulfurreducens*' ability to reduce Fe(III) citrate (27). Along with variation expected from  
365 growth- vs. cell suspension assays, genetic factors could explain these differences. Tn-  
366 Seq data recently revealed many essential genes immediately up- and downstream of  
367 *ppc* paralogs that could have been affected by antibiotic cassette insertions, such as the  
368 cytochrome biosynthesis genes GSU0613-0614 adjacent to *ppcA*/GSU0612, DNA  
369 helicase GSU0363 downstream of *ppcCD*/GSU0364-365, and the purine metabolism  
370 cluster GSU1758-1759 adjacent to *ppcE*/GSU1760 (47). Improvements in genetic tools  
371 and genomic resequencing allowed use of verified markerless deletions to better avoid  
372 polar effects. Also, variations in expression between laboratory strains is common,  
373 especially for *pgcA* (47). A higher background level of PgcA likely aided the finding that  
374 this cytochrome can contribute to periplasmic electron transfer.

375

376 The discovery of a  $\Delta ppcABD$  suppressor mutation in *pgcA* (*pgcA* <sup>$\Delta 37-39$</sup> ) that rescued  
377 Fe(III) citrate growth (Fig 3) revealed an Ala<sup>-2</sup>-Gly<sup>-1</sup>-Cys<sup>+1</sup> lipobox motif likely recognized  
378 by the *Geobacter* prolipoprotein diacylglycerol transferase (Lgt) prior to cleavage by

379 Lsp/SPII peptidase. This motif could be useful for targeting secretion of future  
380 heterologous proteins to the cell surface. It is interesting to note that PgcA was  
381 assigned a periplasmic localization in earlier proteomic studies (periplasmic geobacter  
382 cytochrome A), raising the possibility that a significant amount of this cytochrome is  
383 always present to the periplasm (48).

384

385 The ability of PgcA to aid Fe(III) reduction further underscored the promiscuity of  
386 periplasmic electron transfer (Fig 3 and Fig 4). While both are triheme c-type  
387 cytochromes, there is no significant amino acid sequence similarity between the 50 kDa  
388 PgcA and 10 kDa Ppc proteins, and PgcA contains long repetitive proline-threonine  
389 sequences between each heme. This raises the possibility that other outer membrane  
390 and extracellular multiheme cytochromes could participate in periplasmic electron  
391 transfer, explaining either the residual metal reduction activity in the  $\Delta ppc5 \Delta pgcA$   
392 background or the growth phenotype of  $\Delta ppc5 \Delta pgcA$  mutants on poised electrodes.

393

394 With these new data, the question remains— why does *Geobacter* express multiple *ppc*  
395 paralogs at such high levels when such a metabolic burden appears unnecessary? A  
396 similar strategy, where different abundant periplasmic cytochromes appear to have  
397 overlapping functions, is also observed in the versatile metal-reducing bacterium  
398 *Shewanella oneidensis* (25). One hypothesis involves the ability of periplasmic  
399 cytochromes to act as ‘capacitors’, accepting electrons to enable constant proton motive  
400 force generation until extracellular oxidants can be found (25). Iron-starved *G.*  
401 *sulfurreducens* cells with fewer cytochromes have much slower rates of Fe(III)  
402 reduction, and cells subjected to on/off cycles of electrode polarization produce more  
403 net current while increasing cytochrome expression and electron storage capacity (49–  
404 51). Having multiple promiscuous carriers in the periplasm also increases the likelihood  
405 that new respiratory pathways can be acquired, as they could easily ‘plug in’ to the  
406 *Geobacter* network (22). The fact that *ppc* paralogs from other species fully  
407 complemented growth of mutants (Fig 7) indicates such horizontal exchange is feasible.

408

409 At every step of the *Geobacter* electron transfer chain, proteins that initially appeared  
410 redundant were later found to have non-overlapping roles. The inner membrane  
411 cytochromes ImcH and CbcL are both expressed constitutively, but only ImcH operates  
412 above ~0 V vs. SHE (10–13). The porin-cytochrome complexes OmcB and ExtABCD  
413 are both produced by cells in conductive biofilms, but only ExtABCD appears able to  
414 direct electrons to the electrode (14). Nanowire cytochromes OmcS and OmcE are  
415 linked to metal reduction, while only OmcZ is used for electrode reduction (16). The  
416 promiscuous Ppc family cytochromes show the opposite behavior, collecting electrons  
417 for distribution to any available acceptor, more similar to CctA and FccA in the  
418 *Shewanella* electron transfer network. Such versatility could greatly simplify full  
419 reconstruction of extracellular electron transfer in a heterologous host, and allow  
420 synthetic combinations of proteins from multiple species. In addition, the evidence that  
421 an undiscovered periplasmic carrier exists, which is only functional during electrode  
422 growth, provides a new target for engineering a separate communication network  
423 specifically for interaction with electrical surfaces.

424

425

## 426 **Materials and Methods**

427

### 428 **Medium conditions and Inoculation**

429

430 Strains and plasmids used in this study are listed in Table 1 and Table S1. Cloning  
431 information can be found in Table S2. *G. sulfurreducens* was grown in defined  
432 anaerobic salt medium with 20 mM acetate as the electron donor, and 40 mM fumarate,  
433 55 mM Fe(III) citrate, or 30 mM amorphous Fe(III)-(oxyhydr)oxide as the acceptor as  
434 described (11, 38–40). The medium was prepared with 0.38 g/L KCl, 0.2 g/L NH<sub>4</sub>Cl,  
435 0.069 g/L NaH<sub>2</sub>PO<sub>4</sub>·H<sub>2</sub>O, 0.04 g/L CaCl<sub>2</sub>, 0.2 g/L MgSO<sub>4</sub>·7H<sub>2</sub>O, 10 mL/L of a trace  
436 mineral mix, adjusted to pH to 6.8 and buffered with 2 g/L NaHCO<sub>3</sub>. The trace mineral  
437 mix contained 1.5 g/L nitrilotriacetic acid (NTA), 0.1 g/L MnCl<sub>2</sub>·4H<sub>2</sub>O, 0.5 g/L  
438 Fe<sub>2</sub>SO<sub>4</sub>·7H<sub>2</sub>O, 0.17 g/L CoCl<sub>2</sub>·6H<sub>2</sub>O, 0.10 g/L ZnCl<sub>2</sub>, 0.03 g/L CuSO<sub>4</sub>·5H<sub>2</sub>O, 0.005 g/L  
439 AlK(SO<sub>4</sub>)<sub>2</sub>·12H<sub>2</sub>O, 0.005 g/L H<sub>3</sub>BO<sub>3</sub>, 0.09 g/L Na<sub>2</sub>MoO<sub>4</sub>, 0.05 g/L NiCl<sub>2</sub>, 0.02 g/L  
440 NaWO<sub>4</sub>·2H<sub>2</sub>O, 0.10 g/L Na<sub>2</sub>SeO<sub>4</sub>. For media with Fe(III) citrate or Fe(III) oxide as the  
441 electron acceptor, the chelated trace mineral mix was replaced with non-chelated trace  
442 mineral mix which omitted NTA and instead dissolved minerals in 0.1 M HCl.

443

444 To make Fe(III) oxide, 10 g of FeSO<sub>4</sub>·7H<sub>2</sub>O was added to 1 L of water, and 5.32 mL of  
445 30 % H<sub>2</sub>O<sub>2</sub> added with stirring overnight. This produced schwertmannite  
446 (Fe<sub>8</sub>O<sub>8</sub>(OH)<sub>6</sub>(SO<sub>4</sub>)·nH<sub>2</sub>O), which was washed in distilled water and stored until needed.  
447 After addition of schwertmannite to medium and autoclaving, the Fe(III) ages to an  
448 amorphous Fe(III)-(oxyhydr)oxide, allowing generation of a highly repeatable iron oxide  
449 form between experimental replicates.

450

451 For electrode bioreactor media, 40 mM acetate was added as the electron donor and a  
452 poised graphite electrode (+0.24 V vs. SHE) used as the acceptor. 50 mM NaCl was  
453 added for osmotic balance to replace salts present in typical fumarate or Fe(III)-citrate  
454 growth medium. All media were flushed with N<sub>2</sub>:CO<sub>2</sub> (80:20) gas mix passed through a  
455 heated copper column to remove oxygen.

456

457 All experiments were initiated by streaking out frozen stocks onto anaerobic 1.7 % agar  
458 medium containing 20 mM acetate as the electron donor and 40 mM fumarate as the  
459 electron acceptor in MACS MG-500 gloveless anaerobic chamber, (Don Whitley  
460 Scientific) with N<sub>2</sub>:CO<sub>2</sub>:H<sub>2</sub> (75:20:5). Trypticase peptone (0.1%) and cysteine (1 mM)  
461 were added to promote recovery on the solid medium. Single colonies were picked and  
462 propagated in triplicate 1 mL liquid medium with 20 mM acetate and 40 mM fumarate,  
463 inoculated 1:10 into 10 mL medium for use in experiments. For metal reduction  
464 experiments, cultures at 0.6 OD<sub>600</sub> were inoculated 1:100 into medium containing 20  
465 mM acetate as the electron donor and 55 mM Fe(III) citrate or 30 mM Fe(III) oxide as  
466 the electron acceptor. All cultures were incubated at 30 °C.

467

#### 468 **Fe(III) reduction assay**

469

470 Fe(III) citrate and Fe(III) oxide medium samples were diluted 1:10 into 0.5 N HCl for  
471 each timepoint. The solution was diluted further with 0.5 N HCl when needed. Samples  
472 were analyzed for Fe(II) using a modified FerroZine assay (41). The FerroZine solution  
473 contained 2 g/L FerroZine and 23.8 g/L HEPES with pH adjusted to 7.0. 300 µl of the  
474 FerroZine solution was added to 50 µl of the diluted samples in 96 well plates. The  
475 plates were read at 625 nm by BioTek Synergy multi-mode reader.

476

#### 477 **Growth with poised electrode as electron acceptor**

478

479 Three-electrode bioreactors consist of a 3 cm<sup>2</sup> graphite working electrode set at +0.24 V  
480 vs. SHE, a platinum counter electrode, and a calomel reference electrode. The graphite  
481 working electrode was polished with P1500 sandpaper and sonicated before each use.  
482 Each bioreactor was inoculated with 12 mL of medium with 40 mM acetate and 50 mM  
483 NaCl, and flushed with humidified N<sub>2</sub>:CO<sub>2</sub> (80:20) gas overnight, before inoculation of 4  
484 mL OD<sub>600</sub> 0.5 cells. Cells were grown in 30°C under constant stirring. Biomass attached  
485 to anodes was determined by removing electrodes during exponential growth (as they  
486 reached 100 µA/cm<sup>2</sup>), boiling in 0.2 N NaOH, and determining the total protein  
487 concentration using the Bicinchoninic acid (BCA) assay.

488

#### 489 **Gene deletion and complementation**

490  
491 A sucrose-SacB counter-selection method was employed for construction of scarless  
492 deletion strains (38). Up- and downstream fragments (~ 750 bp each) of the target gene  
493 were joined by overlapping PCR and ligated into pK18*mobsacB*. The plasmid was  
494 purified and Sanger-sequenced to verify the target region after transformation into *E.*  
495 *coli* UQ950. Once confirmed, the plasmid was transformed into *E. coli* S17-1 or MFDpir  
496 to be conjugated with *G. sulfurreducens*. 1 mL of each *G. sulfurreducens* recipient strain  
497 and S17-1 or MFDpir donor strain culture were centrifuged together, decanted, and  
498 resuspended in the residual supernatant. This cell suspension was placed on sterilized  
499 0.22  $\mu$ m pore size filter paper on agar medium with 20 mM acetate and 40 mM fumarate  
500 overnight. Merodiploids were selected on agar medium containing 20 mM acetate and  
501 40 mM fumarate with 200  $\mu$ g/mL kanamycin, and integration of the plasmid at the target  
502 site verified by PCR. Colonies with the integrated *sacB*-containing plasmid were  
503 subjected to sucrose-counter selection on solid agar medium containing 20 mM and 40  
504 mM fumarate with 10% sucrose, to screen for recombination of homologous regions  
505 which should delete the target gene in 50% of events. PCR of re-isolated antibiotic-  
506 sensitive colonies using flanking primers was performed to identify deletion strains.

507

### 508 **Suppressor analysis**

509

510 Replicate cultures of mutants with significant Fe(III) citrate reduction defects, ( $\Delta ppcABD$ ,  
511  $\Delta ppcABCDE$ ,  $\Delta ppcABCDE \Delta pgcA$ ) were grown with 20 mM acetate and 40 mM fumarate,  
512 then inoculated 1:100 into medium with 20 mM acetate and 55 mM Fe(III) citrate. If growth  
513 was detected, cultures were subcultured with Fe(III) citrate, and tubes demonstrating  
514 growth faster than parent cultures then streaked onto plates of agar medium containing  
515 20 mM acetate and 40 mM fumarate to isolate colonies. Individual colonies were re-  
516 screened in medium with 20 mM acetate and 55 mM Fe(III) citrate to identify clonal  
517 suppressor strains. Genomic DNA of these strains was resequenced along with the  
518 parent, and breseq version 0.28.0 used to identify mutations compared to the parent.

519

### 520 **Fractionation of periplasmic proteins**

521

522 A protocol for releasing periplasmic proteins via osmotic shock was adapted from (42).  
523 Periplasmic fractions for Fig 1C, 2C, 3D, 4C, 5C, 5E, 5G, 6B, 7B, S1, S4, S5B, and S6B  
524 are from stationary phase fumarate-grown cultures. Cultures were harvested and  
525 adjusted by OD<sub>600</sub> so all extractions began with the same amount of cells. Fig S2 shows  
526 periplasmic fractions from Fe(III) citrate-grown cultures that reduced Fe(III) to ~ 50 mM.  
527

528 Cultures were centrifuged at 5,200 x g for 10 minutes, pellets were resuspended in 1  
529 mL 50 mM Tris, 250 mM sucrose, 2.5 mM EDTA, pH 8.0, and equilibrated at room  
530 temperature for 5 minutes. This suspension was centrifuged at 16,000 x g at 4 °C for 10  
531 minutes and the supernatant carefully removed. The pellet was rapidly resuspended in  
532 with 200 µl of ice-cold 5 mM MgSO<sub>4</sub> with gentle mixing on ice, causing rapid influx of  
533 water to the periplasm, osmotically disrupting the EDTA-destabilized outer membrane,  
534 and releasing periplasmic proteins. After 30 minutes, cells and debris were removed by  
535 centrifugation at 16,000 x g for 10 minutes at 4 °C. For electrode-grown cells, biofilms  
536 were collected by rinsing off four electrodes with a pipette tip in a tube containing 500 µl  
537 of 50 mM Tris, 250 mM sucrose, 2.5 mM EDTA, pH 8.0 and resuspended in 5 mM 300  
538 µl of MgSO<sub>4</sub> solution. 15 mL of planktonic cultures were collected in 1 mL of 50 mM  
539 Tris, 250 mM sucrose, 2.5 mM EDTA, pH 8.0 and resuspended in 280 µl of MgSO<sub>4</sub>  
540 solution. Electrode-grown cells were collected at a stationary phase.

541  
542 The supernatant containing the periplasmic fraction was boiled at 95 °C for 5 minutes  
543 with SDS loading buffer (omitting β-Mercaptoethanol) and separated on a tricine-SDS-  
544 PAGE gel (adapted from (43)). The 16% resolving gels were made from the solution  
545 containing 5.33 mL acrylamide/bis-acrylamide 19:1 30% (w/v), 4.3 mL of 2.5 M Tris  
546 buffer (pH 8.8), 0.22 mL of dH<sub>2</sub>O with 100 µl of 30 mg/mL APS and 6 µl of TEMED  
547 added to polymerize. The 7% resolving gels were made from 2.33 mL acrylamide/bis-  
548 acrylamide 19:1 30% (w/v), 5.6 mL of 2.5 M Tris buffer (pH 8.8), 1.91 mL of dH<sub>2</sub>O with  
549 150 µl of 30 mg/mL APS and 7 µl of TEMED. The stacking gels were made from the  
550 solution containing 0.66 mL acrylamide/bis-acrylamide 19:1 30% (w/v) solution, 0.76 mL  
551 2.5 M Tris buffer (pH 8.8), 3.42 mL of dH<sub>2</sub>O with 150 µl APS 30 mg/mL and 5 µl  
552 TEMED. All heme-staining periplasmic fraction gels are 16% tricine gels, except Fig 3D



553 and S2A. For detection of *c*-type cytochromes, the gel was dark-incubated for 1 hour in  
554 a solution containing 0.0227 g of 3,3',5,5'-Tetramethylbenzidine dissolved in 15 mL of  
555 methanol and mixed with 35 mL 0.25 M sodium acetate (pH 5.0) for a total 50 mL. The  
556 gel was visualized upon the addition of 1.5 mL of 3 % H<sub>2</sub>O<sub>2</sub> for 10-15 minutes.

557

558 To test if periplasmic fractions contained contaminating membranes, we performed  
559 ultracentrifugation of periplasmic fractions at 177,000 g at 4 °C for 45 minutes (Fig S1).  
560 The samples of pre- and post- ultracentrifugation did not show any significant  
561 difference.

562

### 563 **Hydrogen Peroxide tolerance assay**

564 An assay for hydrogen peroxide (H<sub>2</sub>O<sub>2</sub>) sensitivity was conducted using an H<sub>2</sub>O<sub>2</sub> disc  
565 diffusion assay. 10 mL media containing melted 0.5% molten agar ('0.5% top agar') was  
566 mixed 1:100 from liquid culture of OD<sub>600</sub> 0.6 was poured on top of the solid medium  
567 containing 1.7% agar and 0.1% Trypticase. After 3 hours, autoclaved BBL Blank Paper  
568 Discs (6 mm diameter) were placed on top agar and spotted with 10 µl of 400 mM H<sub>2</sub>O<sub>2</sub>.  
569 The diameter of the zone of inhibition was measured after 2.5 days of incubation at  
570 30 °C in MACS MG-500 gloveless anaerobic chamber, Don Whitley Scientific. The zone  
571 of inhibition around each filter disc was measured by ImageJ.

### 572 **Acknowledgements**

573

574 SC and DB were supported by the Office of Naval Research (Award Number N00014-  
575 18-1-2632). We thank Jeff Gralnick for helpful discussions.

576

577

578 **TABLE 1. Strains used in this study**

| Strains                         | Description or relative genotype                                          | Source         |
|---------------------------------|---------------------------------------------------------------------------|----------------|
| <b><i>G. sulfurreducens</i></b> |                                                                           |                |
| Wild type (WT)                  |                                                                           | Lab collection |
| DB1864                          | $\Delta ppcA$                                                             | This study     |
| DB867                           | $\Delta ppcB$                                                             | This study     |
| DB1483                          | $\Delta ppcC$                                                             | This study     |
| DB1040                          | $\Delta ppcD$                                                             | This study     |
| DB1854                          | $\Delta ppcE$                                                             | This study     |
| DB1853                          | $\Delta ppcBCDE$ ( $ppcA^+$ )                                             | This study     |
| DB1960                          | $\Delta ppcACDE$ ( $ppcB^+$ )                                             | This study     |
| DB1917                          | $\Delta ppcABDE$ ( $ppcC^+$ )                                             | This study     |
| DB1887                          | $\Delta ppcABCE$ ( $ppcD^+$ )                                             | This study     |
| DB1850                          | $\Delta ppcABCD$ ( $ppcE^+$ )                                             | This study     |
| DB1862                          | $\Delta ppcABCDE$ ( $\Delta ppc5$ )                                       | This study     |
| DB1244                          | $\Delta ppcABD$                                                           | This study     |
| DB1977                          | $\Delta ppcABD$ $pgcA^{\Delta 37-39}$                                     | This study     |
| DB1989                          | $\Delta ppcABD$ $\Delta pgcA$                                             | This study     |
| DB1546                          | $\Delta pgcA$                                                             | (37)           |
| DB1976                          | $\Delta ppc5$ $\Delta pgcA$                                               | This study     |
| DB1900                          | $\Delta ppc5$ Tn7:: $ppcA$                                                | This study     |
| DB2161                          | $\Delta ppc5$ Tn7:: $ppcC$                                                | This study     |
| DB2173                          | $\Delta ppc5$ Tn7:: $ppcA_{SP}$ - $ppcE$                                  | This study     |
| DB2005                          | $\Delta ppc5$ $\Delta pgcA$ Tn7:: $ppcA$                                  | This study     |
| DB2064                          | $\Delta ppc5$ $\Delta pgcA$ Tn7:: $ppcC$                                  | This study     |
| DB2007                          | $\Delta ppc5$ $\Delta pgcA$ Tn7:: $ppcE$                                  | This study     |
| DB2062                          | $\Delta ppc5$ $\Delta pgcA$ Tn7:: $ppcA_{SP}$ - $ppcE$                    | This study     |
| DB2148                          | $\Delta ppc5$ $\Delta pgcA$ Tn7:: $ppcE_{SP}$ - $ppcA$                    | This study     |
| DB2149                          | $\Delta ppc5$ $\Delta pgcA$ Tn7:: $ppcA_{SP}$ - $Gmet$ $ppcA$             | This study     |
| DB2210                          | $\Delta ppc5$ $\Delta pgcA$ Tn7:: $ppcA_{SP}$ - $Gmet$ $ppcE$             | This study     |
| DB2150                          | $\Delta ppc5$ $\Delta pgcA$ Tn7:: $ppcA_{SP}$ - $DVU3171$                 | This study     |
| DB2063                          | $\Delta ppc5$ $\Delta pgcA$ Tn7:: $ppcA_{SP}$ - $cctA$                    | This study     |
| <b><i>E. coli</i></b>           |                                                                           |                |
| UQ950                           | Cloning strain                                                            |                |
| S17-1                           | Conjugation donor strain                                                  |                |
| MFDpir                          | Conjugation donor strain                                                  |                |
| DB1325                          | MFDpir conjugation donor strain containing helper plasmid pmobile-CRISPRi | (44)           |
|                                 | UQ950 containing pRK2-Geo2-lacZa                                          | (38)           |
| DB1777                          | UQ950 containing pTn7m-kan-lacZa                                          | This study     |
| DB1880                          | UQ950 containing pTn7-Geo7                                                | (17)           |
| DB1284                          | S17-1 containing pDppcA                                                   | This study     |
| DB1283                          | S17-1 containing pDppcB                                                   | This study     |
| DB968                           | S17-1 containing pDppcC                                                   | This study     |

|        |                                                       |            |
|--------|-------------------------------------------------------|------------|
| DB1003 | S17-1 containing pDppcBC                              | This study |
| DB943  | S17-1 containing pDppcD                               | This study |
| DB1851 | S17-1 containing pDppcE                               | This study |
| DB1782 | S17-1 containing pDpgcA                               | This study |
| DB1927 | S17-1 containing pDpgcA_wo1760                        | This study |
| DB1914 | S17-1 containing pGeo7::ppcA                          | This study |
| DB2056 | S17-1 containing pGeo7::ppcC                          | This study |
| DB1945 | S17-1 containing pGeo7::ppcE                          | This study |
| DB2058 | S17-1 containing pGeo7::ppcA <sub>SP</sub> -ppcE      | This study |
| DB2133 | S17-1 containing pGeo7::ppcE <sub>SP</sub> -ppcA      | This study |
| DB2134 | S17-1 containing pGeo7::ppcA <sub>SP</sub> -Gmet ppcA | This study |
| DB2144 | S17-1 containing pGeo7::ppcA <sub>SP</sub> -Gmet ppcE | This study |
| DB2135 | S17-1 containing pGeo7::ppcA <sub>SP</sub> -DVU3171   | This study |
| DB2192 | MFDpir containing pGeo7::ppcA <sub>SP</sub> -cctA     | This study |

579

580

581 **References Cited**

582

583 1. Gralnick JA, Newman DK. 2007. Extracellular respiration. *Molecular Microbiology*  
584 65:1–11.

585 2. Edwards MJ, Richardson DJ, Paquete CM, Clarke TA. 2020. Role of multiheme  
586 cytochromes involved in extracellular anaerobic respiration in bacteria. *Protein*  
587 *Science* 29:830–842.

588 3. Lovley DR, Holmes DE, Nevin KP. 2004. Dissimilatory Fe(III) and Mn(IV) reduction.  
589 *Advances in Microbial Physiology* 49:219–286.

590 4. Salgueiro CA, Morgado L, Silva MA, Ferreira MR, Fernandes TM, Portela PC. 2022.  
591 From iron to bacterial electroconductive filaments: Exploring cytochrome diversity  
592 using *Geobacter* bacteria. *Coordination Chemistry Reviews* 452:214284.

593 5. Mishra S, Pirbadian S, Mondal AK, El-Naggar MY, Naaman R. 2019. Spin-  
594 dependent electron transport through bacterial cell surface multiheme electron  
595 conduits. *Journal of the American Chemical Society* 141:19198–19202.

596 6. Futera Z, Ide I, Kayser B, Garg K, Jiang X, van Wonderen JH, Butt JN, Ishii H, Pecht  
597 I, Sheves M, Cahen D, Blumberger J. 2020. Coherent electron transport across a 3  
598 nm bioelectronic junction made of multi-heme proteins. *J Physical Chemistry Letters*  
599 11:9766–9774.

- 600 7. Fu T, Liu X, Gao H, Ward JE, Liu X, Yin B, Wang Z, Zhuo Y, Walker DJF, Joshua  
601 Yang J, Chen J, Lovley DR, Yao J. 2020. Bioinspired bio-voltage memristors. *Nature*  
602 *Communications* 11:1861.
- 603 8. Terrell JL, Tschirhart T, Jahnke JP, Stephens K, Liu Y, Dong H, Hurley MM, Pozo M,  
604 McKay R, Tsao CY, Wu H-C, Vora G, Payne GF, Stratis-Cullum DN, Bentley WE.  
605 2021. Bioelectronic control of a microbial community using surface-assembled  
606 electrogenetic cells to route signals. *Nature Nanotechnology* 16:688–697.
- 607 9. Lovley DR, Ueki T, Zhang T, Malvankar NS, Shrestha PM, Flanagan KA, Akujkar M,  
608 Butler JE, Giloteaux L, Rotaru A-E, Holmes DE, Franks AE, Orellana R, Risso C,  
609 Nevin KP. 2011. *Geobacter*: The microbe electric's physiology, ecology, and  
610 practical applications, p. 1–100. *In* Poole, RK (ed.), *Advances in Microbial*  
611 *Physiology*. Academic Press.
- 612 10. Levar CE, Chan CH, Mehta-Kolte MG, Bond DR. 2014. An inner membrane  
613 cytochrome required only for reduction of high redox potential extracellular electron  
614 acceptors. *mBio* 5:e02034-14.
- 615 11. Levar CE, Hoffman CL, Dunshee AJ, Toner BM, Bond DR. 2017. Redox potential as  
616 a master variable controlling pathways of metal reduction by *Geobacter*  
617 *sulfurreducens*. *ISME Journal* 11:741–752.
- 618 12. Zacharoff L, Chan CH, Bond DR. 2016. Reduction of low potential electron  
619 acceptors requires the CbcL inner membrane cytochrome of *Geobacter*  
620 *sulfurreducens*. *Bioelectrochemistry* 107:7–13.

- 621 13. Joshi K, Chan CH, Bond DR. 2021. *Geobacter sulfurreducens* inner membrane  
622 cytochrome CbcBA controls electron transfer and growth yield near the energetic  
623 limit of respiration. *Molecular Microbiology* 116:1124–1139.
- 624 14. Jiménez Otero F, Chan CH, Bond DR. 2018. Identification of different putative outer  
625 membrane electron conduits necessary for Fe(III) citrate, Fe(III) oxide, Mn(IV) oxide,  
626 or electrode reduction by *Geobacter sulfurreducens*. *Journal of Bacteriology*  
627 200:e00347-18.
- 628 15. Wang F, Gu Y, O'Brien JP, Yi SM, Yalcin SE, Srikanth V, Shen C, Vu D, Ing NL,  
629 Hochbaum AI, Egelman EH, Malvankar NS. 2019. Structure of microbial nanowires  
630 reveals stacked hemes that transport electrons over micrometers. *Cell* 177:361-  
631 369.e10.
- 632 16. Aklujkar M, Coppi MV, Leang C, Kim BC, Chavan MA, Perpetua LA, Giloteaux L, Liu  
633 A, Holmes DEY 2013. 2013. Proteins involved in electron transfer to Fe(III) and  
634 Mn(IV) oxides by *Geobacter sulfurreducens* and *Geobacter uraniireducens*.  
635 *Microbiology* 159:515–535.
- 636 17. Wang F, Mustafa K, Suciu V, Joshi K, Chan CH, Choi S, Su Z, Si D, Hochbaum AI,  
637 Egelman EH, Bond DR. 2022. Cryo-EM structure of an extracellular *Geobacter*  
638 OmcE cytochrome filament reveals tetrahaem packing. *Nature Microbiology* 1–10.
- 639 18. Orellana R, Leavitt JJ, Comolli LR, Csencsits R, Janot N, Flanagan KA, Gray AS,  
640 Leang C, Izallalen M, Mester T, Lovley DR. 2013. U(VI) reduction by diverse outer

- 641 surface c-type cytochromes of *Geobacter sulfurreducens*. *Applied and*  
642 *Environmental Microbiology* 79:6369–6374.
- 643 19. Gray HB, Winkler JR. 1996. Electron transfer in proteins. *Annual Reviews in*  
644 *Biochemistry* 65:537–561.
- 645 20. Volkov AN, Nuland NAJ van. 2012. Electron transfer interactome of cytochrome c.  
646 *PLOS Computational Biology* 8:e1002807.
- 647 21. de la Lande A, Babcock NS, Řezáč J, Sanders BC, Salahub DR. 2010. Surface  
648 residues dynamically organize water bridges to enhance electron transfer between  
649 proteins. *Proceedings of the National Academy of Sciences* 107:11799–11804.
- 650 22. Meschi F, Wiertz F, Klauss L, Blok A, Ludwig B, Merli A, Heering HA, Rossi GL,  
651 Ubbink M. 2011. Efficient electron transfer in a protein network lacking specific  
652 interactions. *Journal of the American Chemical Society* 133:16861–16867.
- 653 23. Fernandes AP, Nunes TC, Paquete CM, Salgueiro CA. 2017. Interaction studies  
654 between periplasmic cytochromes provide insights into extracellular electron transfer  
655 pathways of *Geobacter sulfurreducens*. *Biochemical Journal* 474:797–808.
- 656 24. Volkov AN. 2015. Structure and function of transient encounters of redox proteins.  
657 *Accelerated Chemical Research*. 48:3036–3043.
- 658 25. Sturm G, Richter K, Doetsch A, Heide H, Louro RO, Gescher J. 2015. A dynamic  
659 periplasmic electron transfer network enables respiratory flexibility beyond a  
660 thermodynamic regulatory regime. *ISME Journal* 9:1802–1811.

- 661 26. Lloyd JR, Leang C, Hodges Myerson AL, Coppi MV, Cui S, Methe B, Sandler SJ,  
662 Lovley DR. 2003. Biochemical and genetic characterization of PpcA, a periplasmic  
663 c-type cytochrome in *Geobacter sulfurreducens*. *Biochemical Journal* 369:153–161.
- 664 27. Ueki T, DiDonato LN, Lovley DR. 2017. Toward establishing minimum requirements  
665 for extracellular electron transfer in *Geobacter sulfurreducens*. *FEMS Microbiology*  
666 *Letters* 364:093.
- 667 28. Dantas JM, Brausemann A, Einsle O, Salgueiro CA. 2017. NMR studies of the  
668 interaction between inner membrane-associated and periplasmic cytochromes from  
669 *Geobacter sulfurreducens*. *FEBS Letters* 591:1657–1666.
- 670 29. Antunes JMA, Silva MA, Salgueiro CA, Morgado L. 2022. Electron flow from the  
671 inner membrane towards the cell exterior in *Geobacter sulfurreducens*: Biochemical  
672 characterization of cytochrome CbcL. *Frontiers in Microbiology* 13.
- 673 30. Pokkuluri PR, Londer YY, Yang X, Duke NEC, Erickson J, Orshonsky V, Johnson G,  
674 Schiffer M. 2010. Structural characterization of a family of cytochromes c7 involved  
675 in Fe(III) respiration by *Geobacter sulfurreducens*. *Biochimica et Biophysica Acta*  
676 (BBA) - Bioenergetics 1797:222–232.
- 677 31. Ding Y-HR, Hixson KK, Aklujkar MA, Lipton MS, Smith RD, Lovley DR, Mester T.  
678 2008. Proteome of *Geobacter sulfurreducens* grown with Fe(III) oxide or Fe(III)  
679 citrate as the electron acceptor. *Biochimica et Biophysica Acta (BBA) - Proteins and*  
680 *Proteomics* 1784:1935–1941.



- 681 32. Shelobolina ES, Coppi MV, Korenevsky AA, DiDonato LN, Sullivan SA, Konishi H,  
682 Xu H, Leang C, Butler JE, Kim B-C, Lovley DR. 2007. Importance of c-type  
683 cytochromes for U(VI) reduction by *Geobacter sulfurreducens*. BMC Microbiology  
684 7:16.
- 685 33. Santos TC, Silva MA, Morgado L, Dantas JM, Salgueiro CA. 2015. Diving into the  
686 redox properties of *Geobacter sulfurreducens* cytochromes: a model for extracellular  
687 electron transfer. Dalton Transactions 44:9335–9344.
- 688 34. Morgado L, Bruix M, Londer YY, Pokkuluri PR, Schiffer M, Salgueiro CA. 2007.  
689 Redox-linked conformational changes of a multiheme cytochrome from *Geobacter*  
690 *sulfurreducens*. Biochemical and Biophysical Research Communications 360:194–  
691 198.
- 692 35. Morgado L, Bruix M, Pessanha M, Londer YY, Salgueiro CA. 2010. Thermodynamic  
693 characterization of a triheme cytochrome family from *Geobacter sulfurreducens*  
694 reveals mechanistic and functional diversity. Biophysical Journal 99:293–301.
- 695 36. Morgado L, Dantas JM, Bruix M, Londer YY, Salgueiro CA. 2012. Fine tuning of  
696 redox networks on multiheme cytochromes from *Geobacter sulfurreducens* drives  
697 physiological electron/proton energy transduction. Bioinorganic Chemistry and  
698 Applications 2012:e298739.
- 699 37. Zacharoff LA, Morrone DJ, Bond DR. 2017. *Geobacter sulfurreducens* extracellular  
700 multiheme cytochrome PgcA facilitates respiration to Fe(III) oxides but not  
701 electrodes. Frontiers in Microbiology 8:2481.

- 702 38. Chan CH, Levar CE, Zacharoff L, Badalamenti JP, Bond DR. 2015. Scarless  
703 genome editing and stable inducible expression vectors for *Geobacter*  
704 *sulfurreducens*. *Applied and Environmental Microbiology*. 81(20):7178.
- 705 39. Cornell R, Schwertmann U. 2006. The Iron Oxides: structure, properties, reactions,  
706 occurrences and uses. Wiley-VCH Verlag GmbH & Co
- 707 40. Hallberg ZF, Chan CH, Wright TA, Kranzusch PJ, Doxzen KW, Park JJ, Bond DR,  
708 Hammond MC. 2019. Structure and mechanism of a Hypr GGDEF enzyme that  
709 activates cGAMP signaling to control extracellular metal respiration. *eLife* 8:e43959.
- 710 41. Stookey LL. 1970. Ferrozine---a new spectrophotometric reagent for iron. *Analytical*  
711 *Chemistry* 42:779–781.
- 712 42. Ross DE, Ruebush SS, Brantley SL, Hartshorne RS, Clarke TA, Richardson DJ,  
713 Tien M. 2007. Characterization of protein-protein interactions involved in iron  
714 reduction by *Shewanella oneidensis* MR-1. *Applied and Environmental Microbiology*  
715 73:5797–5808.
- 716 43. Haider SR, Reid HJ, Sharp BL. 2012. Tricine-SDS-PAGE, p. 81–91. *In* Kurien, BT,  
717 Scofield, RH (eds.), *Protein Electrophoresis: Methods and Protocols*. Humana  
718 Press, Totowa, NJ.
- 719 44. Choi K-H, Mima T, Casart Y, Rholl D, Kumar A, Beacham IR, Schweizer HP. 2008.  
720 Genetic tools for select-agent-compliant manipulation of *Burkholderia pseudomallei*.  
721 *Applied and Environmental Microbiology* 74:1064–1075.

- 722 45. Zückert WR. 2014. Secretion of bacterial lipoproteins: Through the cytoplasmic  
723 membrane, the periplasm and beyond. *Biochimica et Biophysica Acta (BBA) -*  
724 *Molecular Cell Research* 1843:1509–1516.
- 725 46. Grabowicz M, Silhavy TJ. 2017. Redefining the essential trafficking pathway for  
726 outer membrane lipoproteins. *Proceedings of the National Academy of Sciences*  
727 114:4769–4774.
- 728 47. Chan CH, Levar CE, Jiménez-Otero F, Bond DR. 2017. Genome scale mutational  
729 analysis of *Geobacter sulfurreducens* reveals distinct molecular mechanisms for  
730 respiration and sensing of poised electrodes versus Fe(III) oxides. *Journal of*  
731 *Bacteriology* 199:e00340-17.
- 732 48. Ding Y-HR, Hixson KK, Giometti CS, Stanley A, Esteve-Núñez A, Khare T,  
733 Tollaksen SL, Zhu W, Adkins JN, Lipton MS, Smith RD, Mester T, Lovley DR. 2006.  
734 The proteome of dissimilatory metal-reducing microorganism *Geobacter*  
735 *sulfurreducens* under various growth conditions. *Biochimica et Biophysica Acta*  
736 *(BBA) - Proteins and Proteomics* 1764:1198–1206.
- 737 49. Estevez-Canales M, Kuzume A, Borjas Z, Füeg M, Lovley D, Wandlowski T, Esteve-  
738 Núñez A. 2015. A severe reduction in the cytochrome *c* content of *Geobacter*  
739 *sulfurreducens* eliminates its capacity for extracellular electron transfer.  
740 *Environmental Microbiology Reports* 7:219–226.
- 741 50. Zhang X, PrévotEAU A, Louro RO, Paquete CM, Rabaey K. 2018. Periodic  
742 polarization of electroactive biofilms increases current density and charge carriers

743 concentration while modifying biofilm structure. *Biosensors and Bioelectronics*  
744 121:183–191.

745 51. Esteve-Núñez A, Sosnik J, Visconti P, Lovley DR. 2008. Fluorescent properties of *c*-  
746 type cytochromes reveal their potential role as an extracytoplasmic electron sink in  
747 *Geobacter sulfurreducens*. *Environmental Microbiology* 10:497–505.

748

749

750

### Supplementary Materials

751

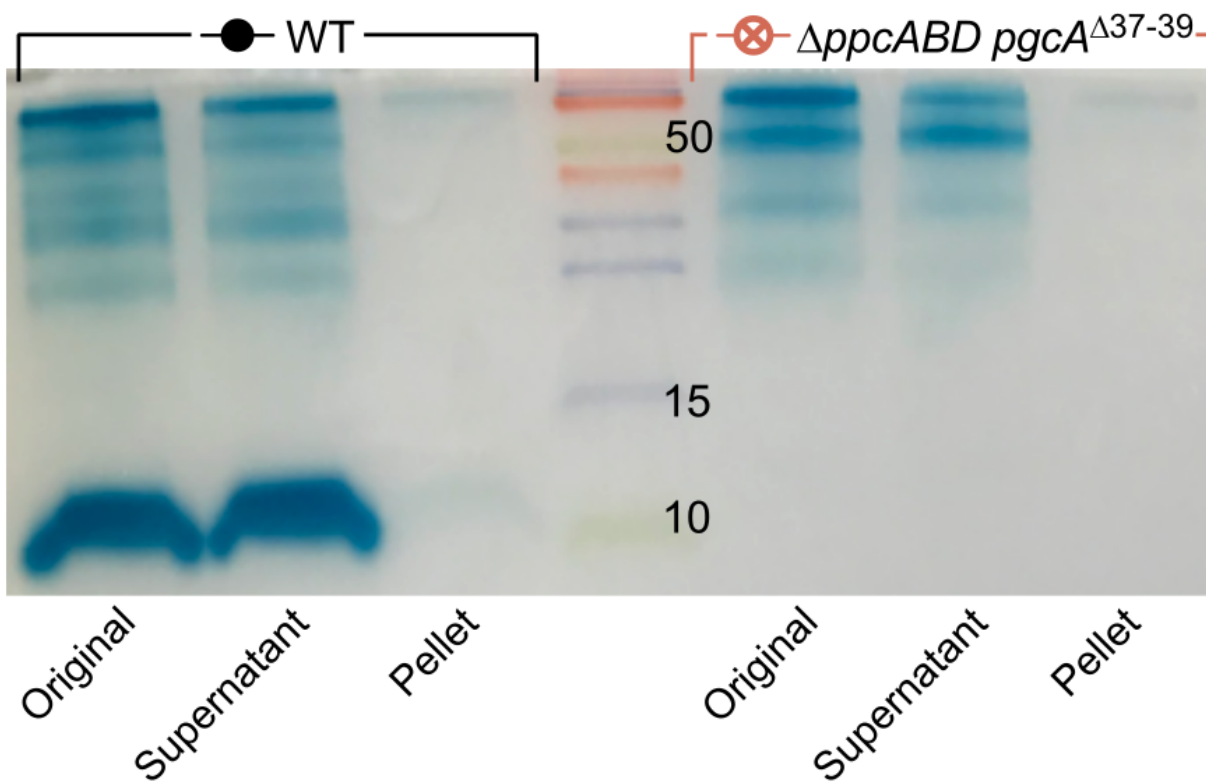

752

753 **Fig S1. Periplasmic fractions pre- and post-ultracentrifugation.** To test if  
754 periplasmic fractions contained significant membrane-bound cytochromes, samples  
755 were subjected to 177,000 g for 45 min. **Original:** total periplasmic fraction before  
756 ultracentrifugation. **Supernatant:** supernatant after ultracentrifugation. **Pellet:**  
757 resuspended fraction of the ultracentrifugation pellet.

758

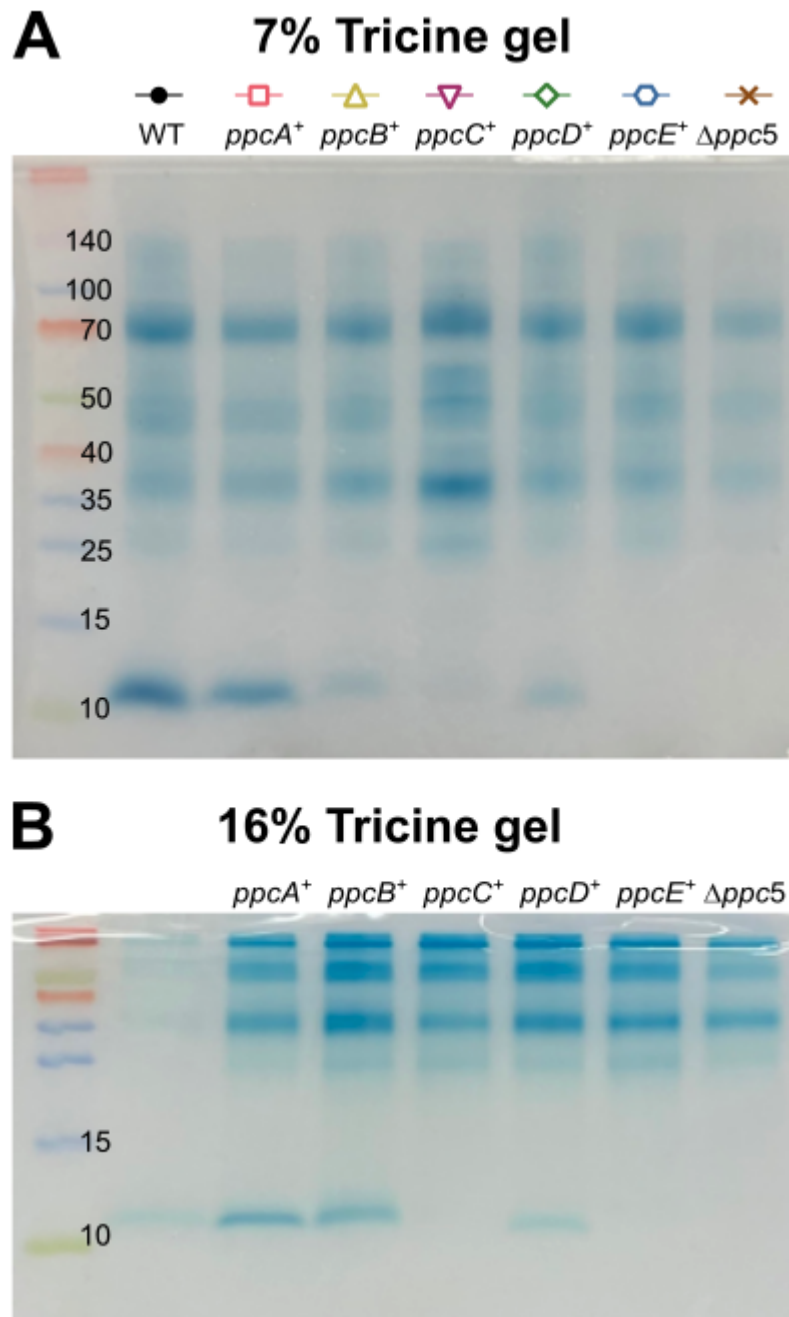

759

760 **Fig S2. Periplasmic cytochrome fractions from Fe(III) citrate-grown cultures**  
761 **showing similar cytochrome abundance as with fumarate grown cells. (A) 7%**  
762 **tricine gel. (B) 16% tricine gel.**

763

764

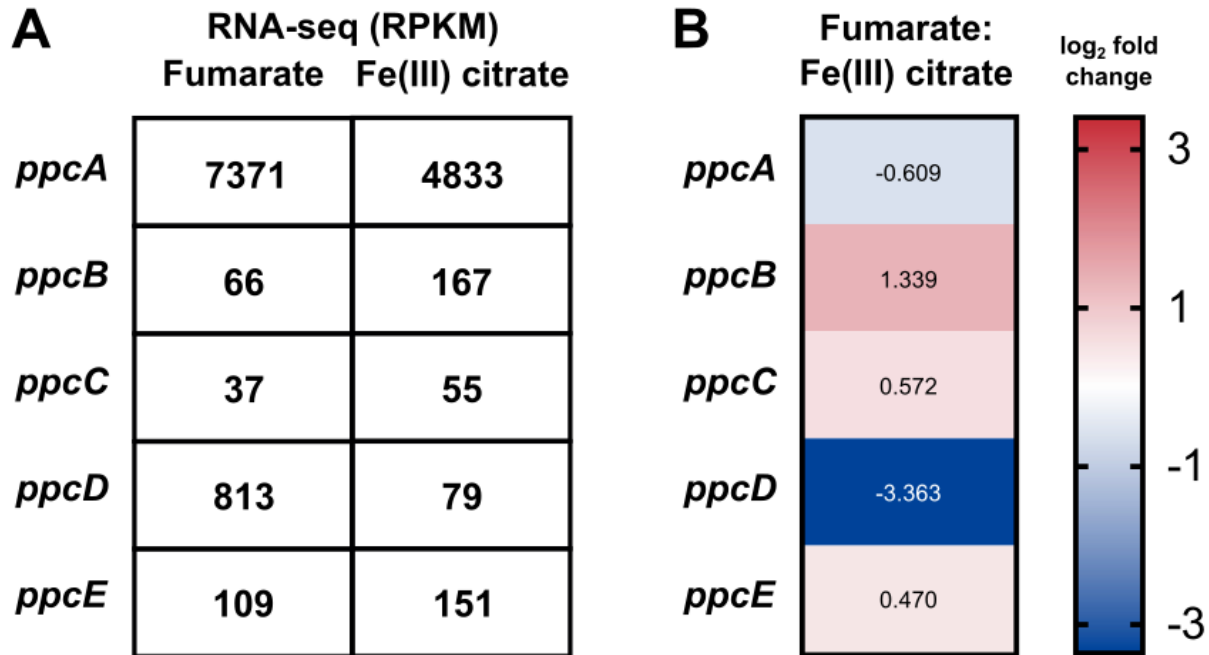

765

766

767

768

769

770

771

**Fig S3. Expression level of Ppc paralog genes comparing fumarate to Fe(III) citrate cultures *G. sulfurreducens*.** Large expression differences have been reported, but primarily from stationary phase cultures or other genetic backgrounds. Adapted from RNA-seq data from Joshi et al. 2020. (A) RNA-seq RPKM values of Ppc-family cytochrome transcripts in *G. sulfurreducens*. (B) Log<sub>2</sub> fold expression change from fumarate to Fe(III) citrate culture.

## 16% Tricine gel

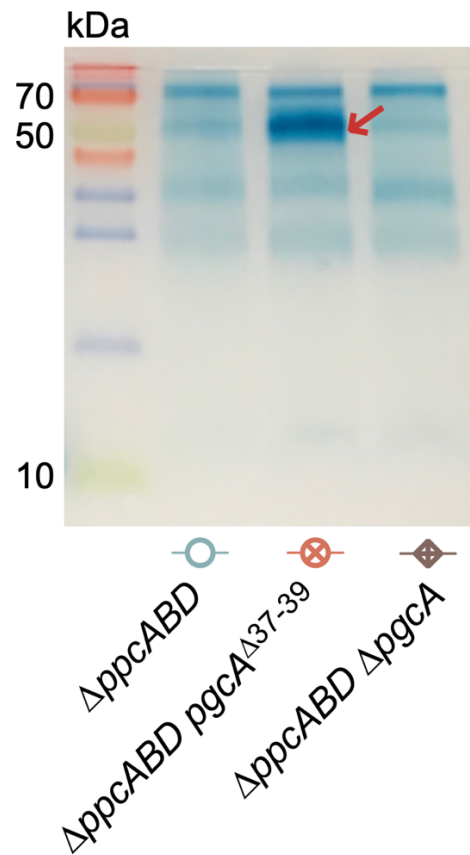

772

773 **Fig S4. Heme-staining of the samples from Fig 3D on a 16% tricine gel.** Proteins

774 with molecular weight over 20 kDa are shown using 16% tricine gel as comparison.

775

776

777



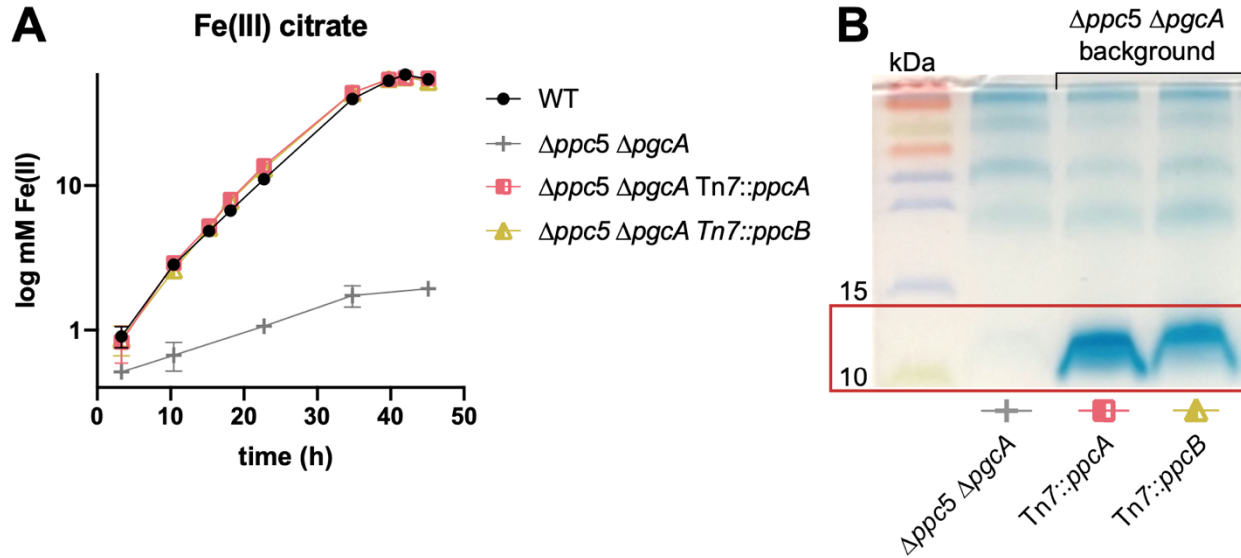

778

779 **Fig S5. Re-introduction of *ppcB* rescues wild type level Fe(III) citrate reduction in**  
780  **$\Delta ppcABCDE \Delta pgcA$ .** (A) Fe(III) citrate reduction. (B) Heme-staining of periplasmic  
781 fraction. Results were similar to strain containing only PpcB in its native context (see Fig  
782 2).

783

784

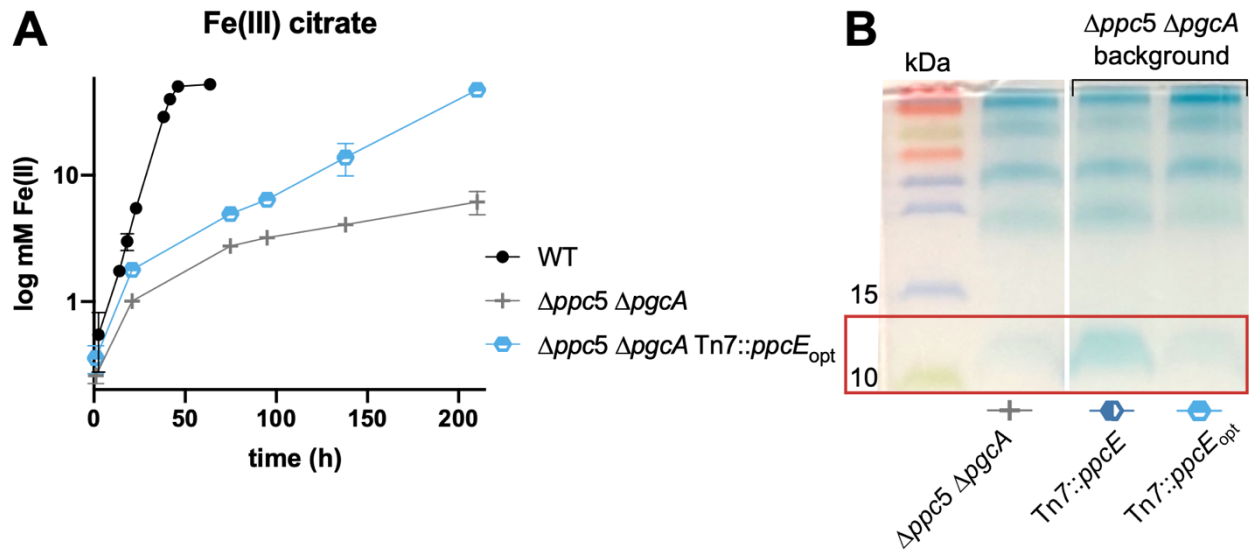

785

786

787

788

789

790

791

792

793

794

795

**Fig S6. Codon-optimization does not increase the abundance of PpcE in periplasm.** A separate experiment was conducted to determine if codon optimization could increase PpcE abundance (A) Fe(III) citrate reduction. (B) Heme-staining of periplasmic fraction. This is the part of the gel picture removed from Fig 5C, as this line of investigation was not pursued further.

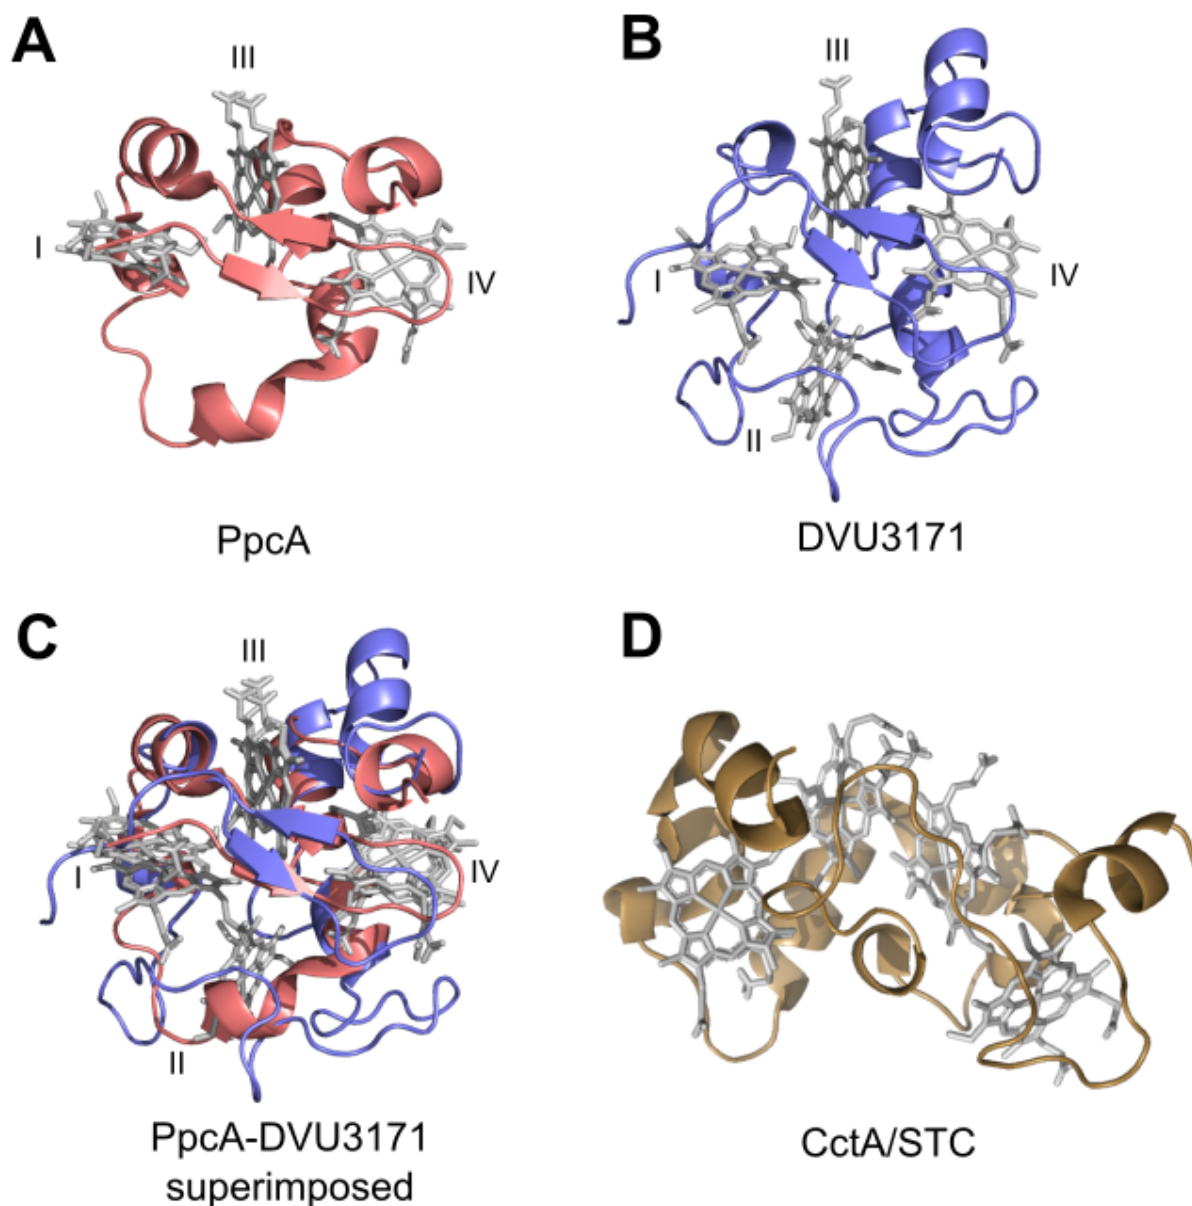

796

797

798 **Fig S7. Structures of periplasmic cytochromes expressed in this work.** Hemes are  
799 shown in gray, designated as heme I, II, III, or IV. (A) PpcA from *G. sulfurreducens*  
800 (PDB: 1OS6). (B) DVU3171 from *D. vulgaris* (Hildenborough) (PDB: 2CTH) (Simoes et  
801 al., 1998) that has an additional heme group (heme II). (C) Structures of PpcA and  
802 DVU3171 superimposed on PyMOL. (D) CctA/STC from *S. oneidensis* (PDB: 1M1Q)  
803 (Leys et al., 2002).

804

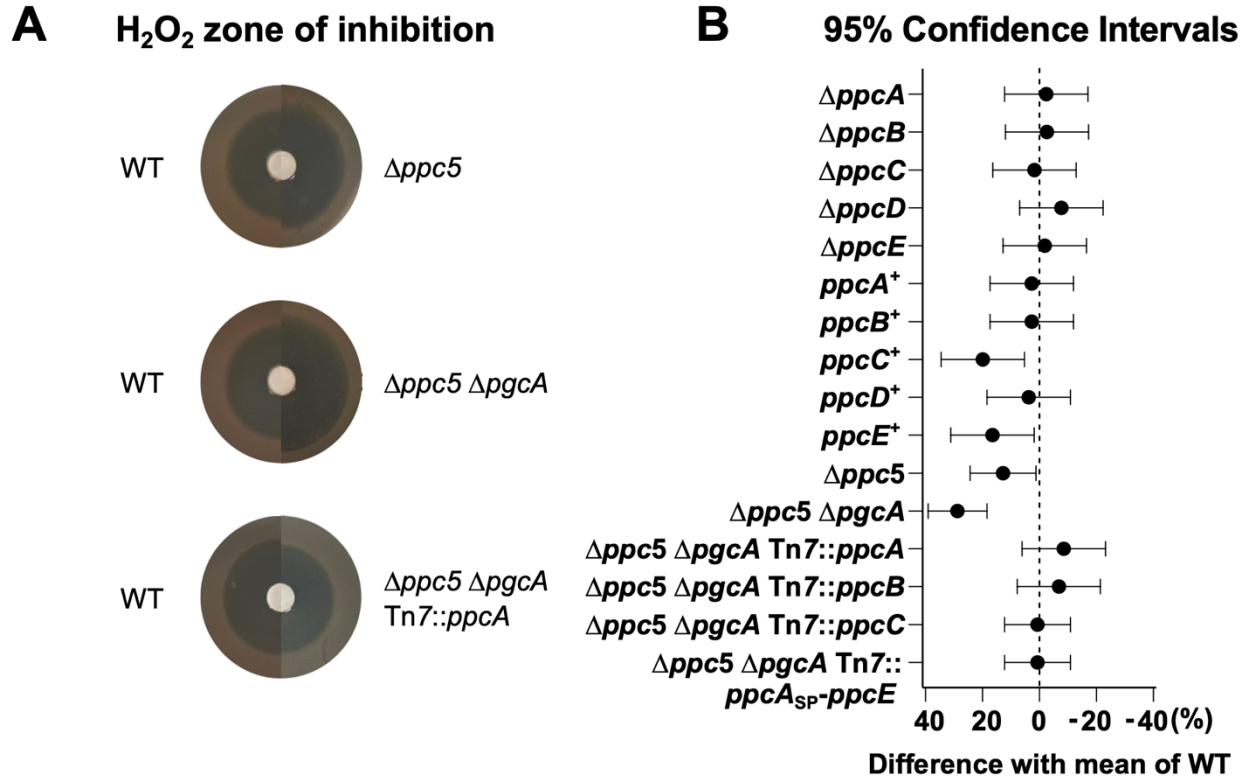

805

806 **Fig S8. H<sub>2</sub>O<sub>2</sub> sensitivity of periplasmic cytochrome mutants.** (A) Pictures showing  
 807 examples of inhibition zone. (B) Area of inhibition for each mutant compared with WT  
 808 (Dunnett's multiple comparison test). Strains where periplasmic fractions show little to  
 809 no 10 kDa cytochrome (*ppcC*<sup>+</sup>, *ppcE*<sup>+</sup>, quintuple, and sextuple mutants) show slightly  
 810 reduced H<sub>2</sub>O<sub>2</sub> tolerance. Each value is calculated by subtracting the WT value from  
 811 each mutant. A more positive difference compared to the WT mean (points shifted left)  
 812 indicates increased sensitivity to oxidative stress, and a larger zone of inhibition by the  
 813 mutant.

814

815

816

817 **Table S1. Plasmids used in this study**

| Plasmid                              | Insert                              | Restriction Enzyme |
|--------------------------------------|-------------------------------------|--------------------|
| <b>pK18mobsacB</b>                   |                                     |                    |
| pDppcA                               | iDppcA                              | BamHI-SacI         |
| pDppcB                               | iDppcB                              | BamHI-SacI         |
| pDppcC                               | iDppcC                              | HindIII-EcoRI      |
| pDppcBC                              | iDppcBC                             | HindIII-EcoRI      |
| pDppcD                               | iDppcD                              | HindIII-EcoRI      |
| pDppcE                               | iDppcE                              | BamHI-EcoRI        |
| pDpgcA                               | iDpgcA                              | BamHI-SacI         |
| pDpgcA_wo1760                        | iDpgcA_wo1760                       | BamHI-EcoRI        |
| <b>pRK2-Geo2-lacZa</b>               |                                     |                    |
| <b>pTn7m-kan-lacZa</b>               | ikan-lacZa                          |                    |
| <b>pTn7-Geo7</b>                     | iGeo7                               | AscI-PmeI          |
| pGeo7::ppcA                          | iGeo7-ppcA                          | NdeI-BamHI         |
| pGeo7::ppcC                          | iGeo7-ppcC                          | NdeI-ApaLI         |
| pGeo7::ppcE                          | iGeo7-ppcE                          | NdeI-BamHI         |
| pGeo7::ppcA <sub>SP</sub> -ppcE      | iGeo7-ppcA <sub>SP</sub> -ppcE      | NdeI-ApaLI         |
| pGeo7::ppcE <sub>SP</sub> -ppcA      | iGeo7-ppcE <sub>SP</sub> -ppcA      | NdeI-ApaLI         |
| pGeo7::ppcA <sub>SP</sub> -Gmet ppcA | iGeo7-ppcA <sub>SP</sub> -Gmet ppcA | NdeI-ApaLI         |
| pGeo7::ppcA <sub>SP</sub> -Gmet ppcE | iGeo7-ppcA <sub>SP</sub> -Gmet ppcE | NdeI-ApaLI         |
| pGeo7::ppcA <sub>SP</sub> -DVU3171   | iGeo7-ppcA <sub>SP</sub> -DVU3171   | NdeI-ApaLI         |
| pGeo7::ppcA <sub>SP</sub> -cctA      | iGeo7-ppcA <sub>SP</sub> -cctA      | NdeI-ApaLI         |

818

819 **Table S2. Insert information for cloning**

|                                                                                                                                                                                                                                                                                                                                                                                                                                                                                                                                       |
|---------------------------------------------------------------------------------------------------------------------------------------------------------------------------------------------------------------------------------------------------------------------------------------------------------------------------------------------------------------------------------------------------------------------------------------------------------------------------------------------------------------------------------------|
| <p><b>Insert:</b> iDppcA</p> <p><b>Description:</b><br/>                     Flanking regions of <i>GSU0612</i> were amplified using the following primers: CHC113 (ACGAGGGATCCCGCAAAGACATCGGCGCC) and CHC114 (TACTTCTTGTGGCACTCGCCGGACAGCGCGAGAGAAGCA); CHC115 (TGCTTCTCTCGCGCTGTCCGGCGAGTGCCACAAGAAGTAA) and CHC116 (ACGAGGAGCTCCTCGGCGAACTCGCTCTTG).<br/>                     These fragments were combined using overlap PCR and ligated into pSMV-3 following a blunt-end repair with SmaI for cloning into pK18mobsacB.</p>     |
| <p><b>Insert:</b> iDppcB</p> <p><b>Description:</b><br/>                     Flanking regions of <i>GSU0364</i> were amplified using the following primers: CHC117 (ACGAGGGATCC GCGTGCTGCTGGAGAAAG) and CHC118 (ACTGATCGCATCCCTGGCC AAGTAATCCGACACCGGCATG); CHC119 (CATGCCGGTGTCCGATTACTT GGCCAGGGATGCGATCAGT) and CHC120 (ACGAGGAGCTC GCGTCTGTGCTGTGTTTC).<br/>                     These fragments were combined using overlap PCR and ligated into pSMV-3 following a blunt-end repair with SmaI for cloning into pK18mobsacB.</p> |

|                                                                                                                                                                                                                                                                                                                                                                                                                                                                                                    |
|----------------------------------------------------------------------------------------------------------------------------------------------------------------------------------------------------------------------------------------------------------------------------------------------------------------------------------------------------------------------------------------------------------------------------------------------------------------------------------------------------|
| <p><b>Insert:</b> iDppcC<br/><b>Description:</b><br/>Flanking regions of <i>GSU0365</i> were amplified using the following primers: CHC321 (GCTAAAGCTTCGCCGGATGGATGGTTGTGGAT) and CHC122 (TTCATTCCAGCAACCGCAGCTAAGGGTGGCTCAACCCATTG); CHC123 (CAATGGGTTGAGCCACCCTTAGCTGCGGTTGCTGGAATGAA) and CHC322 (GCTAGAATTCGGAATGAGCCACTTGATCTCCCG).<br/>These fragments were combined using overlap PCR.</p>                                                                                                  |
| <p><b>Insert:</b> iDppcBC<br/><b>Description:</b><br/>Flanking regions of <i>GSU0364-0365</i> were amplified using the following primers: CHC323 (GCTAAAGCTTGGCGTGCTGCTGGAGAAAGG) and CHC324 (TTCATTCCAGCAACCGCAGCTAAGTAATCCGACACCGGCATG); CHC325 (CATGCCGGTGTGCGATTACTTAGCTGCGGTTGCTGGAATGAA) and CHC322 (GCTAGAATTCGGAATGAGCCACTTGATCTCCCG).<br/>These fragments were combined using overlap PCR.</p>                                                                                            |
| <p><b>Insert:</b> iDppcD<br/><b>Description:</b><br/>Flanking regions of <i>GSU1024</i> were amplified using the following primers: CHC326 (GCTAAAGCTTCGTGCAGCGATTCTTCGGCCT) and CHC126 (ACGACTGATAGCAGCCGCATGCGGTGAGTGCCACAAGAA); CHC127 (TTCTTGTGGCACTCACCGCATGCGGCTGCTATCAGTCGT) and CHC327 (GCTAGAATTCCGGAGCGAAAGGGTGACAAGGA).<br/>These fragments were combined using overlap PCR.</p>                                                                                                        |
| <p><b>Insert:</b> iDppcE<br/><b>Description:</b><br/>Flanking regions of <i>GSU1760</i> were amplified using the following primers: CHC129 (ACGAGGGATCC CGGGACTTCAGGAGAAGGCC) and CHC130 (GCTGTGCTAGCCCGTGTGCATGGCACCGTTCCTCGATC); CHC131 (GATCGAGGAACGGTGCCATGCACACGGGCTAGCACAGC) and CHC181 (ACGAGGAATTCCAAGTGTGAAGGAGCCGTCTG).<br/>These fragments were combined using overlap PCR.</p>                                                                                                         |
| <p><b>Insert:</b> iDpgcA<br/><b>Description:</b><br/>Flanking regions of <i>GSU1761</i> were amplified with the following primers CHC158 (AGCTATGGATCCGAAACGCCTCAGGATCGAAGGAAG) and CHC159 (GTGAGCGTAATTCCCTTGTGCCAGCGTGCCCTGTTGTGTCTG); CHC160 (CAGACACAACAGGGCACGCTCACAAGGGAATTACGCTCACCG) and CHC161 (TGTGTAGAGCTC TCGGTGAGGAGAGGATGGAAC).<br/>These fragments were combined using overlap PCR and ligated into pSMV-3 following a blunt-end repair with SmaI for cloning into pK18mobsacB.</p> |
| <p><b>Insert:</b> iDpgcA_wo1760<br/><b>Description:</b><br/>The following sequence of flanking regions of <i>GSU1761</i> (in the genome background lacking <i>GSU1760/ppcE</i>) were synthesized by Twist Biosciences.</p>                                                                                                                                                                                                                                                                         |

ACCAGGATCCGTTATTCCGCGATCGAGGAACGGTGCCATGCACACGGGCTAGC  
ACAGCGCGCAAACAATTGACGCGGAAGCCGGTTACCCTTCGGATGACCGGCT  
TTTTTGTGCTAAAGAGGAAAACCTCAGGGTTGTCTCCGACAAACCTAAACAAAA  
TGCAGCCCACAACATGCTGCAACAATTAATTTCAAATGGTAACACCCGTAA  
AACATTTTGTGTTGACATTCAGATACAAGGTTTGTAGTTCTATAGTCAGCAATC  
ACCAAACAATCAGATACACGACAATACTAAACCATCCGCGAGGATGGGGCGGA  
AAGCCTAAGGGTCTCCCTGAGACAGCCGGGTCGCCGAAATATCTGAACGAATAT  
CAGGCCCGGCTTTTTGTGCCCGGGCTGCCGGATCGTTCTGATCCGGTACACT  
ACCACGCGCTCAGGGAGGAACTTAATGACCGCACGTAAAGGGCTAATTTGCT  
CCAGACACAACAGGGCACGCTCACAAGGGAATTACGCTCACCGCCGCGGATCT  
TGCAAATCTTAAGACCTTTGTCAACGCAAATGATCAACTCTGATCTCCAACGGA  
AACGGCCTGCTTTTGCAGGCCGTTTTCTATTTCCCGAACTCGGATTATCGTT  
CCGGCGTGCCTCCGCCACCCACCTCTCTCAGTACATGATCGCGCCATCGGCCG  
AACAGGCCGTCATAATCGAGGCCACATCGGCGAACGCCCGTTTCATTGCCTC  
GCCGAGCGACAGGCCACTTCCAGATCTTCGAGGACCATCCGAAGCCGGTGCC  
ATCCATGGGCGGAAACGATAAAATCGACGAGGGAGTAGCTTTGCTCATAGGCAA  
GACGAACCTCACCTCCTTCGAGCCCGGCGAATGATCCTTCAAGGCGTTTCAACG  
GCAAGAACTCACACGTTTAGCCGCTTTTTCCAACCTACCGAGAGGGGGATTGT  
ACTCCAGGCCGCCCTGTATTTGGCAATCCCTCGTTGAATTCACCA

**Insert:** ikan-lacZa

**Description:**

The PacpP controlled lacZa fragment was excised from pRK2-Geo2-lacZa using NheI (then blunted) and Ascl and ligated with pTn7m-kan digested with MunI (then blunted) and Ascl

**Insert:** iGeo7

**Description:**

The following sequence containing *ppcA* promoter and ribosomal binding site was synthesized by Integrated DNA Technologies.

TAATACGACTCACTATAGGGGGCGCGCCCCGGCTAGATTAACCTTGCTGTAATC  
GTGCGGGTTTGACGCGGCTTCCGGCAGCTTTCCACTTGACAAAATCTGCATGTG  
CTGTATAAAAGGTTGCGTTTTTCATCAACCTGTTAGAAAGGGGTAAGAATCATATG  
TGATAAGTAGCCAATTGACTTAGGACGCCCTGCAGGATTGCAATGACCAGTACTT  
GTCCTAGCTACGGATCCACTCGTTGCACGAATTCACGCAGACAGTCGCGGCCGC  
ATCAGTACATCCCTAGGATTCAATGGCACACGTGCACAACATGAGAACACTAGTA  
CCATGTCCACTGTACAAGACATAGCACGTTTAAACCCGCTGAGCAATAACTAGC.

The fragment was digested with Ascl and PmeI and ligated into the same sites in pTn7m-kan-lacZa.

**Insert:** iGeo7-*ppcA*

**Description:**

*ppcA* sequence was amplified using the following primers:

SCP010 (GTCTCATATGAAAAGGTTATTGCTTCTCTCGCGCT)

SCP011(GTCTGGATCCTTACTTCTTGTGGCACTCGCC)

**Insert:** iGeo7-*ppcC*

**Description:**

The following sequence of codon-optimized *ppcC* was synthesized by Twist Biosciences.

GTTCATATGAGATTCATTCCCGCAACCGCAGCTCTTCTCATCATCCTGGCGGGCA  
CTGCCGGCGCCATCGACAAGATCACCTACCCGACCCGGATCGGTGCCGTGGTA  
TTTCCCCACAAAAGCACCAGGACGCCCTCGGCGAATGCCGCGGCTGCCACGA  
AAAGGGGCGGGGCCGGATCGACGGGTTGACAAGGTCATGGCTCACGGCAAG  
GGGTGCAAGGGGTGTCACGAGGAAATGAAGATCGGACCGGTTGTTGCGGGCA  
TTGCCACAAGGGTGGCTCAACCCACTAAGTGAC

**Insert:** iGeo7-*ppcE*

**Description:**

*PpcE* sequence was amplified using the following primers:

SCP017 (GTTCATATGAAACGAACGGTCATTTTATTCGCTGC)

SCP018 (GTCTGGATCCCTAGCCCGTGTGGCAGAGC)

**Insert:** iGeo7-*ppcA<sub>SP</sub>-ppcE*

**Description:**

The following sequence of *ppcE* with *ppcA* signal peptide was synthesized by Twist Biosciences.

ATTGCCACAAGGGTGTACATATGAAAAGGTTATTGCTTCTCTCGCGCTGTCCG  
ATTCTGCGCCGGCCTCGCCTTTGCCGCCGACGTTATCCTGTTCCCGTCCAAAA  
CGGTGCCGTACCTTACCCACAAACGACACTCTGAATTTGTAAGGGAATGCAG  
GAGCTGTCACGAGAAAACCCCTGGTAAATAAGAAATTTGCGCAAGGATTACGC  
CCACAAGACCTGCAAGGGGTGCCACGAAGTGCGGGGCGCTGGACCTACAAAAT  
GCAAGCTCTGCCACACGGGCTAGGTGCAC

**Insert:** iGeo7-*ppcE<sub>SP</sub>-ppcA*

**Description:**

The following sequence of *ppcA* with *ppcE* signal peptide was synthesized by Twist Biosciences.

GCCACAAGGGTGTACATATGAAACGAACGGTCATTTTATTCGCTGCCATGATTC  
TAACCGCCTCTGTGCGCCTTGACGCCGACGACATCGTCCTCAAGGCCAAGAACG  
GTGATGTGAAGTTCCCGCACAAAGGCCACCAGAAGGCTGTTCCCGACTGTAAGA  
AGTGCCACGAGAAAGGCCCGGGCAAGATCGAGGGCTTCGGCAAAGAGATGGCT  
CATGGCAAGGGCTGCAAGGGGTGCCACGAAGAAATGAAGAAGGGGCCGACGAA  
GTGCGGCGAGTGCCACAAGAAGTAAGTGAC

**Insert:** iGeo7-*ppcA<sub>SP</sub>-Gmet ppcA*

**Description:**

The following sequence of *G. metallireducens ppcA* (*Gmet2902*) with *G. sulfurreducens ppcA* signal peptide was synthesized by Twist Biosciences.

ATTGCCACAAGGGTGTACATATGAAAAGGTTATTGCTTCTCTCGCGCTGTCCG  
TATTCTGCGCCGGCCTCGCCTTTGCCGCTGACGAGCTTACCTTCAAGGCAAAGA  
ACGGGGACGTCAAGTTCCCGCACAAAAGCACCAGCAAGTGGTGGGCAACTGC  
AAGAAGTGCCACGAGAAGGGCCCGGGCAAGATCGAGGGCTTTGGCAAGGATTG  
GGCTCACAAGACTTGCAAGGGGTGCCACGAAGAAATGAAGAAGGGGCCGACCA  
AGTGCGGCGATTGCCACAAGAAGTAAGTGAC

**Insert:** iGeo7-*ppcA<sub>SP</sub>-Gmet ppcE*

**Description:**

The following sequence of *G. metallireducens ppcE* (*Gmet1846*) with *G. sulfurreducens ppcA* signal peptide was synthesized by Twist Biosciences.



```
ATTGCCACAAGGGTGTACATATGAAAAAGGTTATTGCTTCTCTCGCGCTGTCCG
TATTCTGCGCCGGCCTCGCCTTTGCCGCGGATACCATGATATTCCCGGCAAAA
ACGGAAATATTACCTTTAATCACAAACACCACACGGATCTCCTCAAGGAATGCAA
GAACTGTCACGACAAAACCCTGGAAGAATTGCCAATTTTCGGCAAAGACTACGC
TCATAAGACCTGCAAGGGATGCCACGAGGTGAGGGGAAGTGGGCCAACGCGCT
GCGGCCTCTGCCACAGGAAGTAGGTGCAC
```

**Insert:** iGeo7-ppcA<sub>SP</sub>-DVU3171

**Description:**

The following sequence of *D. vulgaris* (Hildenborough) DVU3171 with *G.*

*sulfurreducens* ppcA signal peptide was synthesized by Twist Biosciences.

```
CATATGAAAAAGGTTATTGCTTCTCTCGCGCTGTCCGTATTCTGCGCCGGCCTCG
CCTTTGCCGCTCCCAAGGCCCTGCCGACGGCCTGAAGATGGAAGCCACCAAG
CAGCCCGTGGTTTTCAACCACTCCACCCACAAGTCCGTGAAGTGTGGTGACTGC
CACCACCCCGTGAACGGCAAGGAAGACTACCGCAAGTGCGGTACCGCCGGCTG
CCACGACAGCATGGACAAGAAGGACAAGTCCGCGAAGGGCTACTACCATGTCAT
GCATGACAAGAACACCAAGTTCAAGTCCTGCGTGGGTTGCCACGTTGAAGTGGC
CGGTGCCGATGCCGCCAAGAAGAAGGACCTCACCGGCTGCAAGAAGTCCAAGT
GCCACGAATAGGTGCAC
```

**Insert:** iGeo7-ppcA<sub>SP</sub>-cctA

**Description:** The following sequence *S. oneidensis* cctA sequence with *G.*

*sulfurreducens* ppcA signal peptide was synthesized by Twist Biosciences. The sequence is codon-optimized to *G. sulfurreducens*.

```
CATATGAAAAAGGTTATTGCTAGCCTCGCGCTGTCCGTATTCTGCGCCGGCCTC
GCCTTTGCCGCCGACCAGAAGCTGAGCGATTTTCACGCCGAAAGCGGGGGCTG
CGAATCCTGCCACAAGGACGGGACCCCTCGGCCGATGGTGCCTTCGAGTTTCG
CTCAGTGCCAGTCCTGTACGGCAAGCTCTCGGAGATGGATGCTGTCCACAAAC
CCCACGACGGTAACCTGGTCTGCGCCGATTGCCACGCAGTTCACGACATGAATG
TCGGTCAGAAGCCGACGTGCGAGTCGTGCCACGATGACGGACGCACGTCCGCA
TCGGTGCTGAAGAAGTAAGTGCAC
```

820

821

822

823
